# Supplementary material
Source: Research Square preprint supplement (doi:10.21203/rs.3.rs-9304575/v1)
Supplement: Supplementary file 1 [file 1e92c29e8949fdbef8d200e0.pdf]

## Supplementary Materials for

# “A general and extensible algorithmic framework for biological sequence alignment across scales and applications”

Hao Xuan<sup>1</sup>, Hongyang Sun<sup>1</sup>, Xiangtao Liu<sup>2,3</sup>, Hanyuan Zhang<sup>3</sup>, Jun Zhang<sup>4,5</sup> and Cuncong Zhong<sup>1,6,7,\*</sup>

<sup>1</sup>Department of Electrical Engineering and Computer Science, University of Kansas, Lawrence, KS 66045, USA.

<sup>2</sup>School of Artificial Intelligence and Big Data, Guangzhou Vocational University of Science and Technology, Guangzhou, Guangdong, China, 510550

<sup>3</sup>College of Medical Engineering and Technology, Xinjiang Medical University, Ürümqi, Xinjiang 830017, China.

<sup>4</sup>OSF Healthcare Cancer Institute, Peoria, IL 61603, USA

<sup>5</sup>University of Illinois College of Medicine, Peoria, IL 61605 USA

<sup>6</sup>Bioengineering Program, School of Engineering, University of Kansas, Lawrence, KS 66045, USA.

<sup>7</sup>Center for Computational Biology, University of Kansas, Lawrence, KS 66045, USA.

\*Correspondence: [cczhong@ku.edu](mailto:cczhong@ku.edu) (C. Z.)

# 1. VAT Parameter Setting for Different Alignment Applications

## 1.1. All tunable parameters and their default values

- Seed length: (default: 14 for DNA; 8 for protein)
- Minimizer window size: (default: 0)
- Reduced alphabet: reduced amino acid alphabet (default: Murphy.10)
- Pattern number: number of spaced seed patterns (default: 1)
- Match: (default: +5 for DNA; BLOSUM62 for protein)
- Mismatch: (default: -3; BLOSUM62 for protein)
- Gap extension penalty: (default: -1)
- Gap open penalty: (default: -2)
- X-drop threshold ungapped (default: 18)
- X-drop threshold gapped: (default: 18)
- Min. chain length: minimum number of seeds required in a seed chain (default: 2)
- Seed dist. query: maximum distance allowed between two seeds in query (default: 150)
- Seed dist. reference: maximum distance allowed between two seeds in reference (default: 150)
- Seed seq. pattern upstream: the sequence pattern expected from the upstream of the seeds and its associated bonus/penalty score (default: sequence = None; score = 0)
- Seed seq. pattern downstream: the sequence pattern expected from the downstream of the seeds and its associated bonus/penalty score (default: sequence = None; score = 0)
- Inter-chromosome chaining: (default: disallowed)
- Seed padding: successive seeds within same diagonal band skipped (10)
- E-value: maximum e-value to report alignments (default: 0.001)
- Report identity: minimum identity (%) to report an alignment (default: 0)
- Max. target sequences: maximum number of target sequences to report alignments (default: 25)

## 1.2. Next-generation sequencing reads (NGS) mapping

### 1.2.1. Contiguous (WGS, ChIP-seq, ATAC-seq, and 16S microbiome)

- Seed length: 15
- Minimizer window size: 5
- Match: +5
- Mismatch: -2

### 1.2.2. RNA-seq

- Seed length: 14
- Minimizer window size: 5
- Match: +1
- Mismatch: -2
- X-drop threshold ungapped: 15
- X-drop threshold gapped: 15
- Seed dist. query: 1000
- Seed dist. reference: 200000
- Seed seq. pattern upstream: GT, +4
- Seed seq. pattern downstream: AG, +4

### 1.2.3. circRNA

- Seed length: 14
- Minimizer window size: 2
- Match: +1
- Mismatch: -3

- Gap extension penalty: -2
- Gap open penalty: -5
- X-drop threshold ungapped: 15
- X-drop threshold gapped: 15
- Seed dist. query: 1000
- Seed dist. reference: 200000
- Seed seq. pattern upstream: AG, +4
- Seed seq. pattern downstream: GT, +4

#### 1.2.4. **CLASH**

- Seed length: 11
- Minimizer window size: 1
- Match: +5
- Mismatch: -4
- Gap extension penalty: -3
- Gap open penalty: -5
- X-drop threshold ungapped: 10
- X-drop threshold gapped: 10
- Inter-chromosome chaining: allowed

#### 1.2.5. **Hi-C**

- Seed length: 13
- Minimizer window size: 5
- Match: +1
- Mismatch: -3
- Gap extension penalty: -1
- Gap open penalty: -6
- Seed dist. query: 5000
- Seed dist. reference: 5000
- Seed seq. pattern upstream: AAGCTT, +4
- Seed seq. pattern downstream: GATC, +4
- Inter-chromosome chaining: allowed

### 1.3. **Third-generation sequencing read (TGS) mapping**

#### 1.3.1. **Contiguous (WGS, ChIP-seq, ATAC-seq, and 16S microbiome)**

- Seed length: 15
- Minimizer window size: 10
- Mismatch: -4
- Match: +2
- Gap open penalty: -8

#### 1.3.2. **RNA-seq**

- Seed length: 15
- Minimizer window size: 5
- Match: +1
- Mismatch: -2
- Gap extension penalty: -1
- Gap open penalty: -2
- X-drop threshold ungapped: 20
- X-drop threshold gapped: 20
- Seed dist. query: 2000

- Seed dist. reference: 200000
- Seed seq. pattern upstream: GT, +4
- Seed seq. pattern downstream: AG, +4

## **1.4. Homology search**

### **1.4.1. DNA**

- Seed length: 15
- Minimizer window size: 3
- Match: +5
- Mismatch: -4
- Gap extension penalty: -3
- Gap open penalty: -5

### **1.4.2. Protein (sensitive mode)**

- Pattern number: 10
- Gap extension penalty: -1
- Gap open penalty: -11
- Seed padding: 16

### **1.4.3. Protein (fast mode)**

- Pattern number: 3
- Gap extension penalty: -1
- Gap open penalty: -11
- Seed padding threshold: 16

## **1.5. Whole-genome alignment**

- Seed length: 18
- Minimizer window size: 10
- Match: +1
- Mismatch: -5
- Gap extension penalty: -2
- Gap open penalty: -5
- X-drop threshold ungapped: 24
- X-drop threshold gapped: 24
- Seed padding threshold: 55

## 2. Benchmark Experiment Design

### 2.1. NGS

#### 2.1.1. Contiguous

- Benchmark datasets: see Supplementary Table S2
- Ground-truth definition:
  - Read origin (simulated data only): recorded by the simulator Mason<sup>1</sup> during read synthesis.
- Benchmark metrics:
  - Overall mapping rate (simulated data only): proportion of reads successfully mapped to the reference (overlapping > 60% with ground-truth origin).
  - Accuracy: ratio of correctly aligned reads among all aligned reads.
  - Alignment speed: number of reads mapped per second.
  - Minimum alignment identity: lowest acceptable percent identity among aligned segments.
  - Minimum alignment length: shortest aligned region among reported segments.
  - Memory usage: peak RAM consumption (GB).

#### 2.1.2. Split

- Benchmark datasets: Supplementary Table S14
- Ground-truth definition:
  - Simulated data: read origins recorded by BEERS2<sup>2</sup> during synthesis.
  - RNA-seq: split reads on the same chromosome/orientation with  $\leq 10$  kbp distance whose junctions fully overlap annotated splice sites (Ensembl GRCh38<sup>3</sup>).
  - circRNA-seq: back-splicing junctions with reversed segment order and  $\leq 200$  kbp distance; verified against circAtlas 3.0 (~769k human circRNAs)<sup>4</sup>.
  - CLASH: miRNA–mRNA duplexes where both arms overlap < 4 bp (Hyb “perfect” criterion); one arm on miRNA, the other on mRNA 3’ UTR<sup>5-8</sup>.
  - Hi-C: split reads on the same chromosome/orientation with  $\leq 200$  kbp distance spanning annotated chromatin loops from Rao et al. (~10k loops)<sup>9</sup>.
- Benchmark metrics:
  - Overall mapping rate: proportion of reads successfully mapped to ground truth.
  - Accuracy: ratio of correctly aligned reads among all aligned reads.
  - Alignment speed: reads mapped per second.
  - Minimum alignment identity: lowest acceptable percent identity among aligned segments.
  - Minimum alignment length: shortest aligned region among reported segments.
  - Memory usage (real data): peak RAM (GB).
  - Known proportion (split-signal quality): ratio of reads spanning annotated split events to all reads spanning split signals.

### 2.2. TGS

#### 2.2.1. Contiguous

- Benchmark datasets: see Supplementary Table S26
- Ground-truth definition:
  - Read origin (simulated data only): recorded by the simulator Badread<sup>10</sup> during read synthesis.
- Benchmark metrics:
  - Overall mapping rate: proportion of reads successfully mapped to the reference (overlapping > 60% with ground-truth origin).
  - Accuracy: ratio of correctly aligned reads among all aligned reads.
  - Alignment speed: number of reads mapped per second.
  - Minimum alignment identity: lowest acceptable percent identity among aligned segments.
  - Minimum alignment length: shortest aligned region among reported segments.
  - Memory usage (real data): peak RAM consumption (GB).

#### 2.2.2. Split

- Benchmark datasets: see Supplementary Table S38
- Ground-truth definition:
  - Simulated data: read origins recorded by PBSIM<sup>11</sup> during synthesis.

- RNA-seq: split reads on the same chromosome/orientation with  $\leq 10$  kbp inter-segment distance, whose junctions fully overlap annotated splice sites (Ensembl GRCh38).
- Benchmark metrics:
  - Overall mapping rate: proportion of reads successfully mapped to the reference.
  - Known alignments (TGS simulated data): reads spanning multiple junctions with segments correctly matched to ground-truth loci.
  - Accuracy: ratio of correctly aligned reads among all aligned reads.
  - Alignment speed: number of reads mapped per second.
  - Minimum alignment identity: lowest acceptable percent identity among aligned segments.
  - Minimum alignment length: shortest aligned region among reported segments.
  - Memory usage (real data): peak RAM consumption (GB).
  - Known proportion (real data): reads with segments mapped to loci consistent with Ensembl GRCh38 annotation.

## 2.3. Homology search

### 2.3.1. Protein

- Benchmark datasets: target and query sequences derived from Pfam v37.0<sup>12,13</sup>.
  - Sequences were randomly sampled with a cap per Pfam family to maintain diversity.
  - Selected sequences were split into two groups—query set and target database.
- Ground-truth definition:
  - Pfam-A curated families serve as the ground truth; two sequences are considered homologous if they belong to the same Pfam family.
  - Each Pfam family represents evolutionarily related proteins sharing conserved structural and functional domains.
- Benchmark metrics:
  - TP: query and hit from the same curated family (Pfam).
  - FP: hit from a different family.
  - FN: homologous family member not retrieved.
  - Sensitivity: completeness of retrieved homologues.

$$Sensitivity = \frac{TP}{TP + FN}$$

- Precision: reliability of reported hits.

$$Precision = \frac{TP}{TP + FP}$$

- F1 score: harmonic means of precision and sensitivity.

$$Precision = 2 \times \frac{Precision \times Sensitivity}{Precision + Sensitivity}$$

- Alignment speed: number of queries aligned per second.
- Memory usage: peak RAM consumption (GB).

### 2.3.2. DNA

- Benchmark datasets: transcript sequences from the human reference genome used as the reference; query sets generated from known orthologous gene mappings between human and multiple species, including vertebrate and invertebrate model organisms.
- Ground-truth definition:
  - The Homologous Gene Database (HGD)<sup>14</sup> serves as the curated ground truth.
  - Each HGD family contains manually annotated orthologous and paralogous genes, representing validated homologous relationships across species.
- Benchmark metrics:
  - TP: query and hit from the same curated family (HGD).
  - FP: hit from a different family.
  - FN: homologous family member not retrieved.
  - Sensitivity: completeness of retrieved homologues.

$$Sensitivity = \frac{TP}{TP + FN}$$

- Precision: reliability of reported hits.

$$Precision = \frac{TP}{TP + FP}$$

- F1 score: harmonic means of precision and sensitivity.

$$Precision = 2 \times \frac{Precision \times Sensitivity}{Precision + Sensitivity}$$

- Alignment speed: number of queries aligned per second.
- Memory usage: peak RAM consumption (GB).

Supplementary Table S1: Seeding paradigms and default seed lengths across representative sequence alignment and homology search tools. The table summarizes widely used methods for short- and long-read mapping, homology search and whole-genome alignment. Columns report the alignment task, seeding strategy, and the corresponding default seed length and, where applicable, window length. “N/A” indicates parameters not defined within a given framework. All values correspond to default settings.

\*segemehl supports inexact seed matching with a limited number of mismatches (default: one mismatch). VAT does not implement this strategy; instead, it employs spaced-pattern seeding to enable inexact seed matching.

| Software          | Alignment task          | Seeding strategy          | Seed length             | Window length |
|-------------------|-------------------------|---------------------------|-------------------------|---------------|
| <b>BBMAP</b>      | Short read mapping      | Exact <i>k</i> -mer       | 13                      | N/A           |
| <b>BLASR</b>      | Short/long read mapping | Exact <i>k</i> -mer       | 12                      | N/A           |
| <b>Bowtie2</b>    | Short read mapping      | Exact <i>k</i> -mer       | 20                      | N/A           |
| <b>BWA MEM</b>    | Short read mapping      | Exact <i>k</i> -mer       | 19                      | N/A           |
| <b>HISAT2</b>     | Short read mapping      | Exact <i>k</i> -mer       | 20                      | N/A           |
| <b>Minimap2</b>   | Short/long read mapping | Minimizer                 | 15                      | 24            |
| <b>SOAP2</b>      | Short read mapping      | Exact <i>k</i> -mer       | 13                      | N/A           |
| <b>STAR</b>       | Short read mapping      | Exact <i>k</i> -mer       | 5                       | N/A           |
| <b>segemehl</b>   | Short read mapping      | Inexact <i>k</i> -mer*    | 11                      | 12            |
| <b>subread</b>    | Short read mapping      | Exact <i>k</i> -mer       | 16                      | N/A           |
| <b>Tophat2</b>    | Short read mapping      | Exact <i>k</i> -mer       | 20                      | N/A           |
| <b>GMAP</b>       | Long read mapping       | Exact <i>k</i> -mer       | 15                      | N/A           |
| <b>GraphMap2</b>  | Long read mapping       | Minimizer                 | 12                      | 16            |
| <b>ngmlr</b>      | Long read mapping       | Exact <i>k</i> -mer       | 13                      | N/A           |
| <b>BLAST</b>      | Homology search         | Exact <i>k</i> -mer       | 3 (blastp), 11 (blastn) | N/A           |
| <b>pblat</b>      | Homology search         | Exact <i>k</i> -mer       | 11                      | N/A           |
| <b>DIAMOND</b>    | Homology search         | Reduced alphabet, pattern | 10                      | 12, 15        |
| <b>MMseqs2</b>    | Homology search         | Pattern                   | 6, 7                    | 10, 11        |
| <b>RAPSearch2</b> | Homology search         | Reduced alphabet          | 6                       | N/A           |
| <b>MUMmer4</b>    | Whole-genome alignment  | Exact <i>k</i> -mer       | 20                      | N/A           |

Supplementary Table S2: Summary of contiguous next-generation sequencing and reference datasets used in this study, including simulated data and corresponding command-line parameters. The columns represent the dataset label (Label), sequence continuity status (SCS), data type, source organism (Organism), number of reads (# Reads), average read length (Len.), and accession numbers. *H. sapiens* refers to *Homo sapiens*, Gut MG refers to Gut Metagenome, *C. elegans* (*Caenorhabditis elegans*), *D. melan* (*Drosophila melanogaster*), *M. mus* (*Mus musculus*), *O. sativa* (*Oryza sativa*), and *A. thalia* (*Arabidopsis thaliana*). Specifically, NGS-Sim-DS1 is a simulated whole-genome sequencing dataset with an introduced error rate of 0.4%; NGS-Sim-DS2 is a simulated RNA-Seq dataset with an error rate of 0.6%.

| Label                                 | SCS        | Data type  | Organism          | # Reads | Len. | Accession   | Simulation parameters                                                                                                                               |
|---------------------------------------|------------|------------|-------------------|---------|------|-------------|-----------------------------------------------------------------------------------------------------------------------------------------------------|
| <b>NGS-Sim-DS1</b><br>(Mason2 v2.0.9) | Contiguous | Simulation | <i>H. sapiens</i> | 5M      | 150  | N/A         | mason_simulator -ir GRCh38_genomic.fna -n 5000000 --illumina-read-length 150 -o hg38_reads.fa -oa hg38.reads.sam --illumina-prob-mismatch-scale 2.5 |
| <b>NGS-DS1</b>                        | Contiguous | WGS        | <i>H. sapiens</i> | 513M    | 151  | ERR1341796  | N/A                                                                                                                                                 |
| <b>NGS-DS2</b>                        | Contiguous | ChIP-Seq   | <i>H. sapiens</i> | 13.8M   | 150  | SRR32926125 | N/A                                                                                                                                                 |
| <b>NGS-DS3</b>                        | Contiguous | ATAC-seq   | <i>H. sapiens</i> | 19.4M   | 50   | SRR33004526 | N/A                                                                                                                                                 |
| <b>NGS-DS4</b>                        | Contiguous | Amplicon   | Gut MG            | 0.15M   | 301  | SRR27677828 | N/A                                                                                                                                                 |
| <b>NGS-DS5</b>                        | Contiguous | WGS        | <i>C. elegans</i> | 31.3M   | 149  | SRR32699720 | N/A                                                                                                                                                 |
| <b>NGS-DS6</b>                        | Contiguous | WGS        | <i>D. melan</i>   | 8.0M    | 151  | SRR32469661 | N/A                                                                                                                                                 |
| <b>NGS-DS7</b>                        | Contiguous | WGS        | <i>M. mus</i>     | 238.5K  | 150  | SRR32563845 | N/A                                                                                                                                                 |
| <b>NGS-DS8</b>                        | Contiguous | WGS        | <i>O. sativa</i>  | 32.3M   | 149  | ERR13765494 | N/A                                                                                                                                                 |
| <b>NGS-DS9</b>                        | Contiguous | WGS        | <i>A. thalia</i>  | 42.6M   | 99   | SRR32329200 | N/A                                                                                                                                                 |

Supplementary Table S3: Summary of short-read contiguous aligners, their software versions, and the specific command-line parameters used for benchmarking in this study.

| <b>Aligner</b>              | <b>Version</b>     | <b>Command</b>                                                                                                                 |
|-----------------------------|--------------------|--------------------------------------------------------------------------------------------------------------------------------|
| <b>BBMAP</b>                | 35.85              | bbmap.sh in=short_contiguous_reads.fa<br>ref=reference.fa threads=16                                                           |
| <b>BLASR</b>                | 2012               | blasr short_contiguous_reads.fa reference.fa -nproc 16<br>-sam -out                                                            |
| <b>Bowtie2</b>              | 2.5.4              | bowtie2 -x reference.fa.bowtie2.db -L 15 -p 16 -U<br>short_contiguous_reads.fa                                                 |
| <b>BWA MEM</b>              | 0.7.17-r1198-dirty | bwa mem reference.fa short_contiguous_reads.fa<br>-t 16 -k 15                                                                  |
| <b>HISAT2</b>               | 2.2.0              | hisat2 -f -x reference.fa.hisat2.db -U<br>short_contiguous_reads.fa --pen-noncansplice 0 --all -p<br>16 --no-spliced-alignment |
| <b>Minimap2</b>             | 2.30 (r1287)       | minimap2 reference.fa short_contiguous_reads.fa<br>-ax sr -k 15 -w 8 -t 16                                                     |
| <b>SOAP2</b>                | 2.21               | soap -D reference.fa.soap.db -a<br>short_contiguous_reads.fa -p 16                                                             |
| <b>STAR</b>                 | 2.7.11b            | STAR --genomeDir reference.fa.STAR.db --readFilesIn<br>short_contiguous_reads.fa<br>--genomeSAindexNbases 6 --runThreadN 16    |
| <b>segemehl</b>             | 0.2.0-418          | segemehl.x<br>-s -t 16 -d reference.fa -i reference.fa.segemehl.db -q<br>short_contiguous_reads.fa                             |
| <b>Tophat2</b>              | 2.1.1              | tophat2 reference.fa.tophat2.db<br>short_contiguous_reads.fa -p 16                                                             |
| <b>Subread</b>              | 2.0.2              | subread-align<br>-i reference.fa.subread.db -r short_contiguous_reads.fa<br>-t 1 -T 16 -SAMoutput                              |
| <b>VAT (WGS)</b>            | 0.0.1              | VAT nucl short WGS -p 16 -d reference.fa -q<br>short_contiguous_reads.fa                                                       |
| <b>VAT (CHIPSeq)</b>        | 0.0.1              | VAT nucl short CHIPseq -p 16 -d reference.fa -q<br>short_contiguous_reads.fa                                                   |
| <b>VAT (ATACseq)</b>        | 0.0.1              | VAT nucl short ATACseq -p 16 -d reference.fa -q<br>short_contiguous_reads.fa                                                   |
| <b>VAT (16S microbiome)</b> | 0.0.1              | VAT nucl short 16S -p 16 -d reference.fa -q<br>short_contiguous_reads.fa                                                       |

Supplementary Table S4: Benchmark of aligners on simulated contiguous NGS reads from *Homo sapiens*. Metrics include mapping rate (Map rate, %), accuracy (%), minimum alignment identity (Min identity, %), minimum alignment length (Min length), alignment speed (Speed, aligned reads per second), and peak memory usage (RAM, Gb). Best values for each metric, except the minimum identity and minimum length, are highlighted in bold.

| Aligner  | Map rate      | Accuracy     | Min identity | Min length | Speed        | RAM         |
|----------|---------------|--------------|--------------|------------|--------------|-------------|
| VAT      | 99.79         | 98.88        | 93.91        | 118        | 31112        | 14.12       |
| BBMAP    | 95.51         | 98.53        | 87.89        | 51         | 3176         | 8.38        |
| BLASR    | <b>100.00</b> | 97.07        | 84.02        | 40         | 583          | 29.88       |
| Bowtie2  | 93.97         | 97.57        | 79.78        | 34         | 10800        | <b>3.68</b> |
| BWA MEM  | 98.33         | 98.59        | 80.12        | 32         | 12721        | 11.03       |
| HISAT2   | 97.01         | <b>99.05</b> | 94.94        | 120        | 39715        | 4.48        |
| Minimap2 | 95.42         | 98.51        | 93.87        | 26         | 14599        | 11.32       |
| SOAP2    | 58.10         | 98.11        | 94.77        | 118        | <b>42102</b> | 6.69        |
| STAR     | 98.79         | 97.85        | 87.89        | 100        | 28193        | 34.21       |
| segemehl | 94.94         | 97.36        | 80.14        | 71         | 22353        | 32.13       |
| subread  | 89.92         | 98.58        | 85.73        | 43         | 21818        | 7.96        |
| Tophat2  | 94.49         | 98.59        | 90.92        | 110        | 2968         | 10.92       |

Supplementary Table S5: Benchmark of aligners on WGS contiguous NGS reads from *Homo sapiens*. Metrics include mapping rate (Map rate, %), minimum alignment identity (Min identity, %), minimum alignment length (Min length), alignment speed (Speed, aligned reads per second), and peak memory usage (RAM, Gb). Best values for each metric, except the minimum identity and minimum length, are highlighted in bold.

| Aligner  | Map rate      | Min identity | Min length | Speed        | RAM         |
|----------|---------------|--------------|------------|--------------|-------------|
| VAT      | <b>100.00</b> | 81.31        | 133        | <b>25222</b> | 15.01       |
| BBMAP    | 78.23         | 80.94        | 100        | 9653         | 9.68        |
| BLASR    | 99.82         | 80.92        | 38         | 593          | 21.04       |
| Bowtie2  | 50.09         | 85.88        | 121        | 2575         | <b>3.81</b> |
| BWA MEM  | <b>100.00</b> | 83.77        | 30         | 3856         | 20.79       |
| HISAT2   | 89.94         | 79.98        | 128        | 22622        | 4.79        |
| Minimap2 | <b>100.00</b> | 82.13        | 25         | 9000         | 16.94       |
| SOAP2    | 13.22         | 88.23        | 120        | 8211         | 6.68        |
| STAR     | <b>100.00</b> | 81.04        | 100        | 15426        | 30.77       |
| segemehl | 18.19         | 80.41        | 72         | 702          | 36.89       |
| subread  | 27.64         | 81.33        | 15         | 6664         | 8.14        |
| Tophat2  | 38.48         | 82.95        | 102        | 76           | 11.12       |

Supplementary Table S6: Benchmark of aligners on CHIP-seq contiguous NGS reads from *Homo sapiens*. Metrics include mapping rate (Map rate, %), minimum alignment identity (Min identity, %), minimum alignment length (Min length), alignment speed (Speed, aligned reads per second), and peak memory usage (RAM, Gb). Best values for each metric, except the minimum identity and minimum length, are highlighted in bold.

| Aligner  | Map rate     | Min identity | Min length | Speed        | RAM         |
|----------|--------------|--------------|------------|--------------|-------------|
| VAT      | 98.98        | 83.33        | 113        | 25111        | 6.99        |
| BBMAP    | 96.08        | 77.89        | 103        | 791          | 8.74        |
| BLASR    | 98.96        | 79.78        | 40         | 359          | 29.98       |
| Bowtie2  | 85.24        | 83.97        | 101        | 5427         | <b>3.69</b> |
| BWA MEM  | <b>99.37</b> | 82.13        | 30         | 9119         | 9.27        |
| HISAT2   | 78.02        | 85.32        | 124        | <b>25161</b> | 4.64        |
| Minimap2 | 98.37        | 83.03        | 25         | 5927         | 17.08       |
| SOAP2    | 68.92        | 81.77        | 84         | 10299        | 6.45        |
| STAR     | 97.97        | 78.42        | 99         | 19216        | 31.18       |
| segemehl | 93.60        | 79.87        | 91         | 3520         | 17.88       |
| subread  | 71.82        | 82.23        | 43         | 13296        | 21.04       |
| Tophat2  | 84.33        | 80.98        | 108        | 271          | 4.14        |

Supplementary Table S7: Benchmark of aligners on ATAC-seq contiguous NGS reads from *Homo sapiens*. Metrics include mapping rate (Map rate, %), minimum alignment identity (Min identity, %), minimum alignment length (Min length), alignment speed (Speed, aligned reads per second), and peak memory usage (RAM, Gb). Best values for each metric, except the minimum identity and minimum length, are highlighted in bold.

| Aligner  | Map rate      | Min identity | Min length | Speed        | RAM         |
|----------|---------------|--------------|------------|--------------|-------------|
| VAT      | 99.71         | 83.93        | 41         | 38250        | 16.12       |
| BBMAP    | 97.79         | 79.02        | 38         | 8811         | 26.35       |
| BLASR    | <b>100.00</b> | 79.77        | 37         | 449          | 29.82       |
| Bowtie2  | 94.03         | 83.94        | 42         | 30323        | <b>3.49</b> |
| BWA MEM  | 98.58         | 67.99        | 30         | 31797        | 6.94        |
| HISAT2   | 88.10         | 85.60        | 41         | <b>44000</b> | 4.49        |
| Minimap2 | 94.94         | 81.68        | 25         | 7840         | 16.92       |
| SOAP2    | 86.68         | 80.34        | 36         | 22231        | 6.38        |
| STAR     | 99.00         | 81.89        | 32         | 18000        | 29.70       |
| segemehl | 86.13         | 78.96        | 24         | 2385         | 30.88       |
| subread  | 86.89         | 77.11        | 26         | 28065        | 6.83        |
| Tophat2  | 87.62         | 81.03        | 28         | 292          | 7.18        |

Supplementary Table S8: Benchmark of aligners on 16S microbiome contiguous NGS reads. Metrics include mapping rate (Map rate, %), minimum alignment identity (Min identity, %), minimum alignment length (Min length), alignment speed (Speed, aligned reads per second), and peak memory usage (RAM, Gb). Best values for each metric, except the minimum identity and minimum length, are highlighted in bold.

| Aligner  | Map rate     | Min identity | Min length | Speed       | RAM         |
|----------|--------------|--------------|------------|-------------|-------------|
| VAT      | 95.29        | 87.02        | 192        | <b>6313</b> | 2.43        |
| BBMAP    | 90.29        | 85.42        | 184        | 564         | 14.89       |
| BLASR    | <b>96.88</b> | 80.88        | 43         | 314         | 2.13        |
| Bowtie2  | 93.01        | 87.93        | 114        | 6172        | <b>0.54</b> |
| BWA MEM  | 95.48        | 80.67        | 40         | 3169        | 0.89        |
| HISAT2   | 72.97        | 87.03        | 102        | 4845        | 1.87        |
| Minimap2 | 95.03        | 80.94        | 50         | 3362        | 2.10        |
| SOAP2    | 59.90        | 89.24        | 189        | 3539        | 1.57        |
| STAR     | 48.93        | 84.43        | 170        | 426         | 28.88       |
| segemehl | 89.12        | 85.11        | 189        | 126         | 1.03        |
| subread  | 24.08        | 88.32        | 28         | 984         | 6.72        |
| Tophat2  | 71.14        | 84.77        | 184        | 208         | 1.31        |

Supplementary Table S9: Benchmark of aligners on contiguous NGS reads from *Caenorhabditis elegans*. Metrics include mapping rate (Map rate, %), minimum alignment identity (Min identity, %), minimum alignment length (Min length), alignment speed (Speed, aligned reads per second), and peak memory usage (RAM, Gb). Best values for each metric, except the minimum identity and minimum length, are highlighted in bold.

| Aligner  | Map rate      | Min identity | Min length | Speed        | RAM         |
|----------|---------------|--------------|------------|--------------|-------------|
| VAT      | 99.81         | 89.22        | 119        | 79211        | 10.99       |
| BBMAP    | 84.28         | 86.77        | 104        | 6965         | 13.31       |
| BLASR    | 95.45         | 81.84        | 38         | 5302         | 27.88       |
| Bowtie2  | 80.02         | 81.87        | 100        | 25813        | <b>3.97</b> |
| BWA MEM  | 88.91         | 83.99        | 30         | 35564        | 10.88       |
| HISAT2   | 76.85         | 90.68        | 105        | <b>85389</b> | 4.47        |
| Minimap2 | 88.74         | 81.13        | 25         | 32867        | 11.89       |
| SOAP2    | 85.22         | 88.32        | 121        | 9909         | 6.99        |
| STAR     | <b>100.00</b> | 81.14        | 98         | 15873        | 28.13       |
| segemehl | 81.00         | 84.57        | 101        | 6694         | 32.41       |
| subread  | 81.10         | 84.87        | 43         | 27613        | 9.27        |
| Tophat2  | 72.03         | 89.13        | 110        | 800          | 12.03       |

Supplementary Table S10: Benchmark of aligners on contiguous NGS reads from *Drosophila melanogaster*. Metrics include mapping rate (Map rate, %), minimum alignment identity (Min identity, %), minimum alignment length (Min length), alignment speed (Speed, aligned reads per second), and peak memory usage (RAM, Gb). Best values for each metric, except the minimum identity and minimum length, are highlighted in bold.

| Aligner  | Map rate      | Min identity | Min length | Speed        | RAM         |
|----------|---------------|--------------|------------|--------------|-------------|
| VAT      | 99.88         | 88.41        | 119        | <b>62133</b> | 13.41       |
| BBMAP    | 81.35         | 81.01        | 85         | 4327         | 13.88       |
| BLASR    | 99.41         | 80.94        | 52         | 5847         | 15.23       |
| Bowtie2  | 68.85         | 83.76        | 111        | 20864        | 9.04        |
| BWA MEM  | 98.08         | 84.88        | 30         | 30650        | 10.77       |
| HISAT2   | 60.78         | 87.65        | 126        | 60780        | <b>4.93</b> |
| Minimap2 | 98.07         | 88.14        | 25         | 28844        | 12.87       |
| SOAP2    | 39.87         | 86.32        | 120        | 26580        | 6.92        |
| STAR     | <b>100.00</b> | 82.79        | 100        | 25641        | 34.04       |
| segemehl | 66.03         | 83.67        | 109        | 2797         | 47.78       |
| subread  | 78.80         | 80.13        | 43         | 26267        | 8.88        |
| Tophat2  | 41.89         | 81.9         | 112        | 500          | 11.17       |

Supplementary Table S11: Benchmark of aligners on contiguous NGS reads from *Mus musculus*. Metrics include mapping rate (Map rate, %), minimum alignment identity (Min identity, %), minimum alignment length (Min length), alignment speed (Speed, aligned reads per second), and peak memory usage (RAM, Gb). Best values for each metric, except the minimum identity and minimum length, are highlighted in bold.

| Aligner  | Map rate      | Min identity | Min length | Speed        | RAM         |
|----------|---------------|--------------|------------|--------------|-------------|
| VAT      | 99.73         | 89.67        | 39         | <b>19002</b> | 15.98       |
| BBMAP    | 99.66         | 85.13        | 39         | 989          | 9.89        |
| BLASR    | <b>100.00</b> | 83.77        | 31         | 132          | 20.67       |
| Bowtie2  | 99.22         | 85.13        | 39         | 15755        | <b>3.89</b> |
| BWA MEM  | 99.97         | 82.78        | 30         | 13228        | 22.77       |
| HISAT2   | 97.86         | 86.98        | 39         | 16649        | 4.89        |
| Minimap2 | 99.96         | 87.32        | 25         | 2454         | 16.81       |
| SOAP2    | 96.02         | 87.41        | 39         | 6534         | 6.97        |
| STAR     | <b>100.00</b> | 85.87        | 39         | 5954         | 31.04       |
| segemehl | <b>100.00</b> | 88.10        | 39         | 94           | 46.77       |
| subread  | 69.50         | 90.90        | 39         | 10346        | 8.50        |
| Tophat2  | 81.04         | 88.03        | 39         | 193          | 9.83        |

Supplementary Table S12: Benchmark of aligners on contiguous NGS reads from *Oryza sativa*. Metrics include mapping rate (Map rate, %), minimum alignment identity (Min identity, %), minimum alignment length (Min length), alignment speed (Speed, aligned reads per second), and peak memory usage (RAM, Gb). Best values for each metric, except the minimum identity and minimum length, are highlighted in bold.

| Aligner  | Map rate      | Min identity | Min length | Speed        | RAM         |
|----------|---------------|--------------|------------|--------------|-------------|
| VAT      | 99.87         | 88.41        | 31         | 45800        | 15.89       |
| BBMAP    | 96.96         | 83.67        | 30         | 4998         | 7.87        |
| BLASR    | <b>100.00</b> | 84.03        | 29         | 1869         | 25.13       |
| Bowtie2  | 94.38         | 83.89        | 31         | 21450        | <b>4.09</b> |
| BWA MEM  | 98.54         | 86.60        | 30         | 19708        | 12.88       |
| HISAT2   | 88.62         | 87.59        | 29         | <b>49233</b> | 4.98        |
| Minimap2 | 98.60         | 83.87        | 25         | 17927        | 15.77       |
| SOAP2    | 65.92         | 88.23        | 29         | 28661        | 6.60        |
| STAR     | <b>100.00</b> | 80.16        | 24         | 41667        | 31.79       |
| segemehl | 92.89         | 82.98        | 28         | 3676         | 45.16       |
| subread  | 66.50         | 80.76        | 22         | 22931        | 8.31        |
| Tophat2  | 89.84         | 86.41        | 29         | 1800         | 10.47       |

Supplementary Table S13: Benchmark of aligners on contiguous NGS reads from *Arabidopsis thaliana*. Metrics include mapping rate (Map rate, %), minimum alignment identity (Min identity, %), minimum alignment length (Min length), alignment speed (Speed, aligned reads per second), and peak memory usage (RAM, Gb). Best values for each metric, except the minimum identity and minimum length, are highlighted in bold.

| Aligner  | Map rate      | Min identity | Min length | Speed        | RAM         |
|----------|---------------|--------------|------------|--------------|-------------|
| VAT      | 99.89         | 88.91        | 37         | 81923        | 16.08       |
| BBMAP    | 98.40         | 86.57        | 29         | 8708         | 9.10        |
| BLASR    | <b>100.00</b> | 83.78        | 29         | 3356         | 20.78       |
| Bowtie2  | 97.66         | 86.13        | 35         | 42461        | 4.79        |
| BWA MEM  | 98.97         | 82.89        | 30         | 44986        | 10.48       |
| HISAT2   | 92.94         | 89.91        | 35         | <b>92940</b> | <b>4.68</b> |
| Minimap2 | 98.90         | 84.03        | 25         | 39560        | 13.58       |
| SOAP2    | 85.75         | 86.10        | 30         | 50441        | 6.80        |
| STAR     | <b>100.00</b> | 87.89        | 26         | 32258        | 29.33       |
| segemehl | 91.91         | 80.13        | 31         | 2621         | 33.79       |
| subread  | 72.69         | 80.67        | 24         | 29080        | 9.17        |
| Tophat2  | 88.78         | 87.41        | 31         | 1271         | 9.98        |

Supplementary Table S14: Summary of split next-generation sequencing and reference datasets used in this study, including simulated data and corresponding command-line parameters. The columns represent the dataset label (Label), sequence continuity status (SCS), data type, source organism (Organism), number of reads (# Reads), average read length (Len.), and accession numbers. *H. sapiens* refers to *Homo sapiens*, Gut MG refers to Gut Metagenome, *C. elegans* (*Caenorhabditis elegans*), *D. melan* (*Drosophila melanogaster*), *M. mus* (*Mus musculus*), *O. sativa* (*Oryza sativa*), and *A. thalia* (*Arabidopsis thaliana*). Specifically, NGS-Sim-DS1 is a simulated whole-genome sequencing dataset with an introduced error rate of 0.4%; NGS-Sim-DS2 is a simulated RNA-Seq dataset with an error rate of 0.6%.

| Label                       | SCS   | Data type  | Organism          | # Reads | Len. | Accession   | Simulation parameters                                                                                                                                           |
|-----------------------------|-------|------------|-------------------|---------|------|-------------|-----------------------------------------------------------------------------------------------------------------------------------------------------------------|
| <b>NGS-Sim-DS2 (BEERS2)</b> | Split | Simulation | <i>H. sapiens</i> | 10M     | 100  | N/A         | perl reads_simulator.pl 10000000 T1_PE100 -readlength 100 -fraglength 100,250,500 -error 0.0061 -subfreq 0 -indelfreq 0 -mastercfgdir master_cfg -outdir T1_low |
| <b>NGS-DS10</b>             | Split | RNA-Seq    | <i>H. sapiens</i> | 108M    | 101  | SRR534301   | N/A                                                                                                                                                             |
| <b>NGS-DS11</b>             | Split | circRNA    | <i>H. sapiens</i> | 13.3M   | 101  | SRR1636985  | N/A                                                                                                                                                             |
| <b>NGS-DS12</b>             | Split | CLASH      | <i>H. sapiens</i> | 52.7M   | 55   | SRR959751   | N/A                                                                                                                                                             |
| <b>NGS-DS13</b>             | Split | Hi-C       | <i>H. sapiens</i> | 1.52M   | 95   | SRR1658825  | N/A                                                                                                                                                             |
| <b>NGS-DS14</b>             | Split | RNA-Seq    | <i>C. elegans</i> | 3.6M    | 130  | SRR31943890 | N/A                                                                                                                                                             |
| <b>NGS-DS15</b>             | Split | RNA-Seq    | <i>D. melan</i>   | 19.8M   | 150  | SRR30712194 | N/A                                                                                                                                                             |
| <b>NGS-DS16</b>             | Split | RNA-Seq    | <i>M. mus</i>     | 25.5M   | 151  | SRR32754573 | N/A                                                                                                                                                             |
| <b>NGS-DS17</b>             | Split | RNA-Seq    | <i>O. sativa</i>  | 19.7M   | 150  | SRR32695903 | N/A                                                                                                                                                             |
| <b>NGS-DS18</b>             | Split | RNA-Seq    | <i>A. thalia</i>  | 14.1M   | 126  | SRR32771535 | N/A                                                                                                                                                             |

Supplementary Table S15: Summary of short-read split aligners, their software versions, and the specific command-line parameters used for benchmarking in this study.

| <b>Aligner</b>       | <b>Version</b>     | <b>Command</b>                                                                                                                 |
|----------------------|--------------------|--------------------------------------------------------------------------------------------------------------------------------|
| <b>BBMAP</b>         | 35.85              | bbmap.sh in=short_split_reads.fa ref=reference.fa threads=16                                                                   |
| <b>BLASR</b>         | 2012               | blasr short_split_reads.fa reference.fa -nproc 16 -sam -out                                                                    |
| <b>Bowtie2</b>       | 2.5.4              | bowtie2 -x reference.fa.bowtie2.db -L 15 -p 16 -U short_split_reads.fq                                                         |
| <b>BWA MEM</b>       | 0.7.17-r1198-dirty | bwa mem reference.fa short_split_reads.fa -t 16 -k 15 -k 4 -D 20 -R 3 -N 0 --score-min L,18,0 --end-to-end --rdg 5,1 --rfg 5,1 |
| <b>HISAT2</b>        | 2.2.0              | hisat2 -f -p 16 -x reference.fa.hisat2.db -U short_split_reads.fa                                                              |
| <b>Minimap2</b>      | 2.30 (r1287)       | minimap2 reference.fa short_split_reads.fa -k 15 -ax splice:hq -t 16                                                           |
| <b>SOAP2</b>         | 2.21               | soap -D reference.fa.soap.db -a short_split_reads.fa -p 16                                                                     |
| <b>STAR</b>          | 2.7.11b            | STAR --genomeDir reference.fa.STAR.db --readFilesIn short_split_reads.fa --genomeSAindexNbases 6 --runThreadN 16               |
| <b>segemehl</b>      | 0.2.0-418          | segemehl.x -s -t 16 -d reference.fa -i reference.fa.segemehl.db -q short_split_reads.fa                                        |
| <b>Tophat2</b>       | 2.1.1              | tophat2 reference.fa.tophat2.db short_split_reads.fa -p 16                                                                     |
| <b>Subread</b>       | 2.0.2              | subread-align -i reference.fa.subread.db -r short_split_reads.fa -t 0 -T 16 -SAMoutput                                         |
| <b>Subread</b>       | 2.0.2              | subread-align -i reference.fa.subread.db -r short_split_reads.fa -t 1 -T 16 -SAMoutput                                         |
| <b>VAT (RNA-seq)</b> | 0.0.1              | VAT nucl short RNAseq -p 16 -d reference.fa -q short_split_reads.fa                                                            |
| <b>VAT (CircRNA)</b> | 0.0.1              | VAT nucl short CircRNA -p 16 -d reference.fa -q short_split_reads.fa                                                           |
| <b>VAT (CLASH)</b>   | 0.0.1              | VAT nucl short CLASH -p 16 -d reference.fa -q short_split_reads.fa                                                             |
| <b>VAT (Hi-C)</b>    | 0.0.1              | VAT nucl short HiC -p 16 -d reference.fa -q short_split_reads.fa                                                               |

Supplementary Table S16: Benchmark of aligners on simulated split NGS reads from *Homo sapiens*. Metrics include mapping rate (Map rate, %), proportions of contiguous alignments (Contiguous, %), proportions of split alignments (Split, %), accuracy (%), proportion of known split events (Known, %), alignment speed (Speed, aligned reads per second), and peak memory usage (RAM, Gb). Values in bold indicate the best performance for each metric.

| Aligner  | Map rate     | Contiguous   | Split        | Accuracy     | Known        | Speed        | RAM         |
|----------|--------------|--------------|--------------|--------------|--------------|--------------|-------------|
| VAT      | <b>98.70</b> | 83.98        | <b>14.72</b> | 97.27        | <b>87.96</b> | 62917        | 17.92       |
| BBMAP    | 96.18        | 82.41        | 13.77        | 93.85        | 67.88        | 7433         | 13.31       |
| BLASR    | 95.00        | 83.69        | 11.31        | 88.76        | 28.43        | 3248         | 29.78       |
| Bowtie2  | 96.96        | <b>85.77</b> | 11.19        | 89.59        | 28.03        | 16876        | <b>3.96</b> |
| BWA MEM  | 93.96        | 80.19        | 13.77        | 90.08        | 45.77        | 17334        | 8.85        |
| HISAT2   | 98.62        | 84.33        | 14.29        | <b>97.45</b> | 86.82        | <b>83482</b> | 5.13        |
| Minimap2 | 94.83        | 80.27        | 14.56        | 93.56        | 69.91        | 25295        | 22.94       |
| SOAP2    | 86.03        | 75.62        | 10.41        | 89.08        | 23.17        | 42949        | 7.33        |
| STAR     | 97.92        | 83.20        | <b>14.72</b> | 95.01        | 80.11        | 74992        | 33.97       |
| segemehl | 95.03        | 80.81        | 14.22        | 93.88        | 75.58        | 4602         | 34.67       |
| subread  | 95.25        | 80.77        | 14.48        | 94.64        | 74.77        | 47136        | 9.28        |
| Tophat2  | 96.39        | 83.58        | 12.81        | 94.85        | 70.62        | 2988         | 11.10       |

Supplementary Table S17: Benchmark of aligners on real circRNA split NGS reads from *Homo sapiens*. Metrics include mapping rate (Map rate, %), proportions of contiguous alignments (Contiguous, %), proportions of split alignments (Split, %), proportion of known split events (Known, %), alignment speed (Speed, aligned reads per second), and peak memory usage (RAM, Gb). Values in bold indicate the best performance for each metric.

| Aligner  | Map rate     | Contiguous   | Split       | Known        | Speed        | RAM         |
|----------|--------------|--------------|-------------|--------------|--------------|-------------|
| VAT      | <b>97.98</b> | 91.07        | <b>6.91</b> | <b>22.11</b> | 64062        | 18.11       |
| BBMAP    | 88.78        | 84.89        | 3.89        | 14.33        | 11646        | 7.89        |
| BLASR    | 95.81        | <b>93.81</b> | 2.00        | 15.71        | 7295         | 25.12       |
| Bowtie2  | 96.99        | 91.91        | 5.08        | 19.88        | 20182        | <b>3.78</b> |
| BWA MEM  | 95.77        | 89.80        | 5.97        | 20.34        | 27624        | 11.23       |
| HISAT2   | 48.96        | 44.07        | 4.89        | 13.26        | 28968        | 4.84        |
| Minimap2 | 67.00        | 64.03        | 2.97        | 18.94        | 34348        | 19.01       |
| SOAP2    | 34.80        | 33.84        | 0.96        | 12.81        | 22008        | 7.13        |
| STAR     | 90.03        | 87.05        | 2.98        | 16.44        | <b>64610</b> | 33.88       |
| segemehl | 92.04        | 85.91        | 6.13        | 19.24        | 10259        | 51.41       |
| subread  | 88.50        | 83.47        | 5.03        | 18.46        | 12955        | 8.89        |
| Tophat2  | 80.98        | 77.11        | 3.87        | 17.78        | 4569         | 10.15       |

Supplementary Table S18: Benchmark of aligners on real RNA-seq split NGS reads from *Homo sapiens*. Metrics include mapping rate (Map rate, %), proportions of contiguous alignments (Contiguous, %), proportions of split alignments (Split, %), proportion of known split events (Known, %), alignment speed (Speed, aligned reads per second), and peak memory usage (RAM, Gb). Values in bold indicate the best performance for each metric.

| Aligner  | Map rate     | Contiguous   | Split        | Known        | Speed        | RAM         |
|----------|--------------|--------------|--------------|--------------|--------------|-------------|
| VAT      | <b>99.33</b> | 62.81        | 36.52        | <b>94.27</b> | <b>21619</b> | 16.89       |
| BBMAP    | 95.70        | 70.32        | 25.38        | 67.60        | 2344         | 11.88       |
| BLASR    | 95.77        | <b>83.48</b> | 12.29        | 16.19        | 1361         | 26.93       |
| Bowtie2  | 80.39        | 53.48        | 26.91        | 68.70        | 11551        | <b>3.89</b> |
| BWA MEM  | 96.55        | 71.89        | 24.66        | 31.65        | 18182        | 8.95        |
| HISAT2   | 90.31        | 56.84        | 33.47        | 93.01        | 19867        | 5.47        |
| Minimap2 | 98.01        | 64.99        | 33.02        | 73.00        | 6250         | 19.89       |
| SOAP2    | 57.61        | 38.18        | 19.43        | 0.11         | 9344         | 7.27        |
| STAR     | 99.24        | 62.01        | <b>37.23</b> | 91.42        | 16667        | 34.03       |
| segemehl | 93.32        | 62.11        | 31.21        | 69.62        | 3084         | 37.91       |
| subread  | 90.26        | 56.79        | 33.47        | 80.82        | 14095        | 9.13        |
| Tophat2  | 84.22        | 55.52        | 28.70        | 74.18        | 1149         | 10.88       |

Supplementary Table S19: Benchmark of aligners on real CLASH split NGS reads from *Homo sapiens*. Metrics include mapping rate (Map rate, %), proportions of contiguous alignments (Contiguous, %), proportions of split alignments (Split, %), proportion of known split events (Known, %), alignment speed (Speed, aligned reads per second), and peak memory usage (RAM, Gb). Values in bold indicate the best performance for each metric.

| Aligner         | Map rate     | Contiguous   | Split        | Known        | Speed         | RAM         |
|-----------------|--------------|--------------|--------------|--------------|---------------|-------------|
| VAT             | 97.17        | 31.28        | <b>65.89</b> | <b>95.35</b> | <b>114514</b> | 8.91        |
| <b>BMAP</b>     | 74.18        | <b>74.18</b> | 0.00         | 0.00         | 25218         | 7.88        |
| <b>BLASR</b>    | 65.21        | 65.21        | 0.00         | 0.00         | 7367          | 18.78       |
| <b>Bowtie2</b>  | <b>98.15</b> | 39.91        | 58.24        | 95.31        | 46463         | 4.03        |
| <b>BWA MEM</b>  | 96.95        | 41.04        | 55.91        | 94.22        | 9704          | 9.89        |
| <b>HISAT2</b>   | 25.87        | 25.87        | 0.00         | 0.00         | 36593         | <b>3.21</b> |
| <b>Minimap2</b> | 90.85        | 35.89        | 54.96        | 90.42        | 79749         | 6.33        |
| <b>SOAP2</b>    | 22.11        | 22.11        | 0.00         | 0.00         | 33668         | 7.19        |
| <b>STAR</b>     | 55.50        | 49.93        | 5.57         | 25.00        | 7912          | 31.88       |
| <b>segemehl</b> | 64.08        | 63.50        | 0.58         | 17.11        | 7245          | 36.89       |
| <b>subread</b>  | 68.01        | 55.99        | 12.02        | 25.41        | 34147         | 8.87        |
| <b>Tophat2</b>  | 47.89        | 47.89        | 0.00         | 0.00         | 6601          | 7.98        |

Supplementary Table S20: Benchmark of aligners on real Hi-C split NGS reads from *Homo sapiens*. Metrics include mapping rate (Map rate, %), proportions of contiguous alignments (Contiguous, %), proportions of split alignments (Split, %), proportion of known split events (Known, %), alignment speed (Speed, aligned reads per second), and peak memory usage (RAM, Gb). Values in bold indicate the best performance for each metric.

| Aligner  | Map rate     | Contiguous   | Split       | Known        | Speed        | RAM         |
|----------|--------------|--------------|-------------|--------------|--------------|-------------|
| VAT      | <b>99.13</b> | 95.02        | 4.11        | <b>32.33</b> | 59955        | 16.33       |
| BBMAP    | 91.26        | 88.37        | 2.89        | 20.63        | 3599         | 15.93       |
| BLASR    | 98.10        | 95.17        | 2.93        | 22.79        | 1056         | 10.91       |
| Bowtie2  | 98.48        | <b>96.11</b> | 2.37        | 30.36        | 4198         | 3.89        |
| BWA MEM  | 98.76        | 95.89        | 2.87        | 31.96        | 21931        | 10.96       |
| HISAT2   | 73.00        | 69.96        | 3.62        | 15.34        | 75924        | <b>2.66</b> |
| Minimap2 | 98.01        | 95.88        | 2.13        | 32.25        | 17907        | 15.89       |
| SOAP2    | 60.45        | 58.46        | 1.99        | 3.64         | 18708        | 7.78        |
| STAR     | 98.08        | 91.97        | 6.11        | 18.22        | <b>82365</b> | 31.32       |
| segemehl | 89.82        | 83.43        | <b>6.39</b> | 26.94        | 28473        | 41.45       |
| subread  | 80.43        | 76.40        | 4.03        | 25.90        | 24742        | 98.78       |
| Tophat2  | 74.70        | 71.72        | 2.98        | 3.82         | 645          | 10.87       |

Supplementary Table S21: Benchmark of aligners on real RNA-seq split NGS reads from *Caenorhabditis elegans*. Metrics include mapping rate (Map rate, %), proportions of contiguous alignments (Contiguous, %), proportions of split alignments (Split, %), proportion of known split events (Known, %), alignment speed (Speed, aligned reads per second), and peak memory usage (RAM, Gb). Values in bold indicate the best performance for each metric.

| Aligner  | Map rate     | Contiguous   | Split        | Known        | Speed        | RAM         |
|----------|--------------|--------------|--------------|--------------|--------------|-------------|
| VAT      | <b>99.29</b> | 66.98        | 32.31        | <b>78.20</b> | 32097        | 12.94       |
| BBMAP    | 97.22        | 77.03        | 20.19        | 50.63        | 6107         | 16.33       |
| BLASR    | 96.98        | 61.87        | <b>35.11</b> | 51.01        | 1366         | 26.89       |
| Bowtie2  | 87.01        | 75.89        | 11.12        | 12.51        | 20810        | <b>3.92</b> |
| BWA MEM  | 99.03        | <b>86.14</b> | 12.89        | 19.97        | 24808        | 10.83       |
| HISAT2   | 97.99        | 68.96        | 29.03        | 73.13        | <b>40829</b> | 4.88        |
| Minimap2 | 96.98        | 79.09        | 17.89        | 38.51        | 20606        | 13.78       |
| SOAP2    | 76.40        | 63.59        | 12.81        | 2.60         | 19110        | 8.82        |
| STAR     | 22.10        | 19.02        | 3.08         | 2.81         | 7419         | 23.79       |
| segemehl | 93.99        | 70.95        | 23.04        | 53.13        | 5193         | 39.14       |
| subread  | 72.31        | 51.03        | 21.28        | 51.75        | 5975         | 9.20        |
| Tophat2  | 87.09        | 66.95        | 20.14        | 47.03        | 2433         | 10.37       |

Supplementary Table S22: Benchmark of aligners on real RNA-seq split NGS reads from *Drosophila melanogaster*. Metrics include mapping rate (Map rate, %), proportions of contiguous alignments (Contiguous, %), proportions of split alignments (Split, %), proportion of known split events (Known, %), alignment speed (Speed, aligned reads per second), and peak memory usage (RAM, Gb). Values in bold indicate the best performance for each metric.

| Aligner  | Map rate     | Contiguous   | Split        | Known        | Speed        | RAM         |
|----------|--------------|--------------|--------------|--------------|--------------|-------------|
| VAT      | <b>99.18</b> | 68.29        | <b>30.89</b> | <b>90.30</b> | <b>58824</b> | 15.87       |
| BBMAP    | 89.99        | 61.76        | 28.23        | 75.02        | 5150         | 14.42       |
| BLASR    | 93.02        | 79.98        | 13.04        | 18.21        | 1550         | 23.99       |
| Bowtie2  | 88.09        | 75.20        | 12.89        | 14.29        | 25114        | <b>3.75</b> |
| BWA MEM  | 92.99        | <b>80.05</b> | 12.94        | 32.50        | 19496        | 11.80       |
| HISAT2   | 68.98        | 46.10        | 22.88        | 63.75        | 9200         | 4.74        |
| Minimap2 | 88.95        | 59.91        | 29.04        | 79.86        | 13455        | 15.89       |
| SOAP2    | 58.93        | 49.12        | 9.81         | 3.71         | 34247        | 8.30        |
| STAR     | 98.68        | 67.91        | 30.77        | 90.04        | 16667        | 30.11       |
| segemehl | 96.97        | 74.01        | 22.96        | 63.75        | 3904         | 33.76       |
| subread  | 68.82        | 41.72        | 27.10        | 77.14        | 18421        | 8.20        |
| Tophat2  | 95.97        | 67.76        | 28.21        | 81.71        | 1811         | 10.94       |

Supplementary Table S23: Benchmark of aligners on real RNA-seq split NGS reads from *Mus musculus*. Metrics include mapping rate (Map rate, %), proportions of contiguous alignments (Contiguous, %), proportions of split alignments (Split, %), proportion of known split events (Known, %), alignment speed (Speed, aligned reads per second), and peak memory usage (RAM, Gb). Values in bold indicate the best performance for each metric.

| Aligner  | Map rate     | Contiguous   | Split        | Known        | Speed        | RAM         |
|----------|--------------|--------------|--------------|--------------|--------------|-------------|
| VAT      | <b>99.22</b> | 52.94        | <b>46.28</b> | <b>92.05</b> | 25641        | 17.20       |
| BBMAP    | 97.90        | 60.01        | 37.89        | 72.15        | 4055         | 13.13       |
| BLASR    | 98.98        | <b>72.19</b> | 26.79        | 24.59        | 317          | 28.27       |
| Bowtie2  | 71.83        | 53.79        | 18.04        | 14.27        | 13646        | <b>4.02</b> |
| BWA MEM  | 98.99        | 70.86        | 28.13        | 40.39        | 15348        | 8.89        |
| HISAT2   | 90.87        | 46.99        | 43.88        | 84.88        | <b>37829</b> | 4.91        |
| Minimap2 | 98.91        | 56.87        | 42.04        | 78.78        | 6599         | 17.93       |
| SOAP2    | 51.89        | 41.01        | 10.88        | 1.90         | 11788        | 7.34        |
| STAR     | 96.95        | 59.78        | 37.17        | 77.68        | 33333        | 34.21       |
| segemehl | 71.94        | 48.88        | 23.06        | 41.95        | 1941         | 40.00       |
| subread  | 84.95        | 50.78        | 34.17        | 69.56        | 18620        | 8.98        |
| Tophat2  | 80.76        | 54.99        | 25.77        | 49.37        | 970          | 10.80       |

Supplementary Table S24: Benchmark of aligners on real RNA-seq split NGS reads from *Oryza sativa*. Metrics include mapping rate (Map rate, %), proportions of contiguous alignments (Contiguous, %), proportions of split alignments (Split, %), proportion of known split events (Known, %), alignment speed (Speed, aligned reads per second), and peak memory usage (RAM, Gb). Values in bold indicate the best performance for each metric.

| Aligner  | Map rate     | Contiguous   | Split        | Known        | Speed        | RAM         |
|----------|--------------|--------------|--------------|--------------|--------------|-------------|
| VAT      | 99.21        | 65.94        | 33.27        | <b>91.12</b> | 66667        | 14.21       |
| BBMAP    | 96.89        | 67.16        | 29.73        | 76.64        | 7017         | 10.85       |
| BLASR    | 95.88        | <b>73.87</b> | 22.01        | 36.77        | 1362         | 26.78       |
| Bowtie2  | 73.89        | 58.01        | 15.88        | 23.93        | 20960        | <b>3.82</b> |
| BWA MEM  | 98.38        | 72.02        | 26.36        | 52.64        | 39612        | 9.89        |
| HISAT2   | 92.97        | 66.94        | 26.03        | 66.03        | <b>85255</b> | 4.85        |
| Minimap2 | 97.77        | 63.81        | 33.96        | 85.16        | 28888        | 16.12       |
| SOAP2    | 58.85        | 45.97        | 12.88        | 4.35         | 36888        | 7.47        |
| STAR     | <b>99.35</b> | 65.05        | <b>34.30</b> | 87.09        | 76923        | 31.86       |
| segemehl | 71.09        | 60.96        | 10.13        | 15.48        | 4329         | 42.13       |
| subread  | 95.07        | 67.06        | 28.01        | 73.38        | 25158        | 9.30        |
| Tophat2  | 88.78        | 60.88        | 27.90        | 68.12        | 2469         | 10.96       |

Supplementary Table S25: Benchmark of aligners on real RNA-seq split NGS reads from *Arabidopsis thaliana*. Metrics include mapping rate (Map rate, %), proportions of contiguous alignments (Contiguous, %), proportions of split alignments (Split, %), proportion of known split events (Known, %), alignment speed (Speed, aligned reads per second), and peak memory usage (RAM, Gb). Values in bold indicate the best performance for each metric.

| Aligner  | Map rate     | Contiguous   | Split        | Known        | Speed        | RAM         |
|----------|--------------|--------------|--------------|--------------|--------------|-------------|
| VAT      | <b>99.52</b> | 59.03        | <b>40.49</b> | <b>91.04</b> | 11111        | 13.11       |
| BBMAP    | 97.79        | 61.01        | 36.78        | 81.78        | 859          | 9.88        |
| BLASR    | 95.77        | 74.05        | 21.72        | 22.05        | 1053         | 24.23       |
| Bowtie2  | 73.05        | 60.87        | 12.18        | 12.97        | 2459         | <b>3.98</b> |
| BWA MEM  | 97.78        | <b>77.02</b> | 20.76        | 36.48        | 5445         | 12.78       |
| HISAT2   | 95.08        | 56.98        | 38.10        | 83.24        | <b>14909</b> | 4.87        |
| Minimap2 | 97.97        | 64.18        | 33.79        | 70.54        | 8099         | 15.21       |
| SOAP2    | 59.17        | 47.99        | 11.18        | 2.81         | 3094         | 8.10        |
| STAR     | 99.37        | 60.97        | 38.40        | 82.70        | 11236        | 30.31       |
| segemehl | 94.89        | 61.78        | 33.11        | 71.21        | 1836         | 40.89       |
| subread  | 96.83        | 60.01        | 36.82        | 87.02        | 2288         | 8.90        |
| Tophat2  | 91.98        | 54.89        | 37.09        | 80.86        | 618          | 10.93       |

Supplementary Table S26: Summary of the contiguous third-generation sequencing (TGS) datasets and simulation commands used in this study. The columns represent the dataset label (Label), sequence continuity status (SCS), data type, source organism (Organism), number of reads (# Reads), average read (Len.), and accession numbers. *H. sapiens* refers to *Homo sapiens*, Gut MG refers to Gut Metagenome, *C. elegans* (*Caenorhabditis elegans*), *D. melan* (*Drosophila melanogaster*), *M. mus* (*Mus musculus*), *O. sativa* (*Oryza sativa*), and *A. thalia* (*Arabidopsis thaliana*). Specifically, TGS-Sim-DS1 is a simulated whole-genome sequencing dataset with an error rate of 12%; TGS-Sim-DS2 is a simulated RNA-Seq dataset with an introduced error rate of 15%. TGS-Sim-DS3 is a simulated Hi-C dataset with an error rate of 15%.

| Label                            | SCS        | Data type  | Organism          | # Reads | Len.  | Accession   | Simulation parameters                                                                                                                                                                                                                                                        |
|----------------------------------|------------|------------|-------------------|---------|-------|-------------|------------------------------------------------------------------------------------------------------------------------------------------------------------------------------------------------------------------------------------------------------------------------------|
| <b>TGS-Sim-DS1<br/>(Badread)</b> | Contiguous | Simulation | <i>H. sapiens</i> | 0.5M    | 2500  | N/A         | badread simulate --reference GRCh38_genomic.fna --quantity 1x -<br>-error_model random --<br>qscore_model ideal --glitches 0,0,0 --<br>junk_reads 0 --random_reads 0 --<br>chimeras 0 --identity 30,3 --length<br>20000,1000 --start_adapter_seq "" --<br>end_adapter_seq "" |
| <b>TGS-DS1</b>                   | Contiguous | WGS        | <i>H. sapiens</i> | 0.67M   | ~10k  | ERR2184700  | N/A                                                                                                                                                                                                                                                                          |
| <b>TGS-DS2</b>                   | Contiguous | ChIP-Seq   | <i>H. sapiens</i> | 0.88M   | 4563  | SRR27030338 | N/A                                                                                                                                                                                                                                                                          |
| <b>TGS-DS3</b>                   | Contiguous | ATAC-seq   | <i>H. sapiens</i> | 31K     | 4328  | SRR17667631 | N/A                                                                                                                                                                                                                                                                          |
| <b>TGS-DS4</b>                   | Contiguous | Amplicon   | Gut MG            | 49K     | 766   | SRR32253554 | N/A                                                                                                                                                                                                                                                                          |
| <b>TGS-DS6</b>                   | Contiguous | WGS        | <i>C. elegans</i> | 1.1M    | 7063  | SRR32300787 | N/A                                                                                                                                                                                                                                                                          |
| <b>TGS-DS7</b>                   | Contiguous | WGS        | <i>D. melan</i>   | 876.0K  | 8610  | SRR31826012 | N/A                                                                                                                                                                                                                                                                          |
| <b>TGS-DS8</b>                   | Contiguous | WGS        | <i>M. mus</i>     | 3.2M    | 7621  | ERR12143047 | N/A                                                                                                                                                                                                                                                                          |
| <b>TGS-DS9</b>                   | Contiguous | WGS        | <i>O. sativa</i>  | 496.2K  | 16329 | ERR13336064 | N/A                                                                                                                                                                                                                                                                          |
| <b>TGS-DS10</b>                  | Contiguous | WGS        | <i>A. thalia</i>  | 988.8K  | 583   | ERR14129311 | N/A                                                                                                                                                                                                                                                                          |

Supplementary Table S27: Summary of long-read contiguous aligners, their software versions, and the specific command-line parameters used for benchmarking in this study.

| Aligner          | Version      | Command                                                                                                                                                                                                                                                                                                                                                                                                                                                                                                                                                                                                                                                                                                    |
|------------------|--------------|------------------------------------------------------------------------------------------------------------------------------------------------------------------------------------------------------------------------------------------------------------------------------------------------------------------------------------------------------------------------------------------------------------------------------------------------------------------------------------------------------------------------------------------------------------------------------------------------------------------------------------------------------------------------------------------------------------|
| <b>BLASR</b>     | 2012         | blasr long_contiguous_reads.fa reference.fa -nproc 16 -sam -bestn 10                                                                                                                                                                                                                                                                                                                                                                                                                                                                                                                                                                                                                                       |
| <b>GMAP</b>      | 6/24/2024    | graphmap2 -r reference.fa -q long_contiguous_reads.fa -f samse -t 16                                                                                                                                                                                                                                                                                                                                                                                                                                                                                                                                                                                                                                       |
| <b>GraphMap2</b> | 0.6.5        | -t 16                                                                                                                                                                                                                                                                                                                                                                                                                                                                                                                                                                                                                                                                                                      |
| <b>Minimap2</b>  | 2.30 (r1287) | minimap2 reference.fa long_contiguous_reads.fa -ax splice -uf -k14 -t 16                                                                                                                                                                                                                                                                                                                                                                                                                                                                                                                                                                                                                                   |
| <b>ngmlr</b>     | 0.2.7        | ngmlr -r reference.fa -q long_contiguous_reads.fa -x ont -t 16                                                                                                                                                                                                                                                                                                                                                                                                                                                                                                                                                                                                                                             |
| <b>STARlong</b>  | 2.7.11b      | STARlong --genomeDir STAR_db<br>--readFilesIn long_contiguous_reads.fa<br>--runThreadN 16 \<br>--seedSearchStartLmax 14 \<br>--seedPerReadNmax 100000 \<br>--seedPerWindowNmax 100 \<br>--winAnchorMultimapNmax 200 \<br>--outFilterMultimapNmax 100000 \<br>--outFilterMismatchNmax 100000 \<br>--outFilterScoreMin 0 --outFilterScoreMinOverLread 0 \<br>--outFilterMatchNmin 0 --outFilterMatchNminOverLread 0 \<br>--alignIntronMin 20 --alignIntronMax 1000000 \<br>--alignSJoverhangMin 8 --alignSJDBoverhangMin 1 \<br>--alignMatesGapMax 1000000 \<br>--clip3pAfterAdapterNbases 1 --clip5pNbases 0 \<br>--chimOutType WithinBAM SoftClip \<br>--outSAMtype SAM \<br>--limitBAMsortRAM 12000000000 |
| <b>VAT</b>       | 0.0.1        | VAT nucl long WGS -p 16 -d reference.fa -q long_contiguous_reads.fa                                                                                                                                                                                                                                                                                                                                                                                                                                                                                                                                                                                                                                        |

Supplementary Table S28: Benchmark of aligners on simulated contiguous TGS reads from *Homo sapiens*. Metrics include mapping rate (Map rate, %), accuracy (%), minimum alignment identity (Min identity, %), minimum alignment length (Min length), alignment speed (Speed, aligned reads per second), and peak memory usage (RAM, Gb). Best values for each metric, except the minimum identity and minimum length, are highlighted in bold.

| Aligner          | Map rate     | Accuracy     | Min identity | Min length | Speed     | RAM          |
|------------------|--------------|--------------|--------------|------------|-----------|--------------|
| <b>VAT</b>       | <b>96.81</b> | <b>98.60</b> | 91.13        | 259        | <b>57</b> | 23.43        |
| <b>BLASR</b>     | 96.03        | 97.52        | 66.89        | 198        | 2         | 23.78        |
| <b>GMAP</b>      | 94.29        | 98.06        | 89.87        | 248        | 3         | 13.31        |
| <b>GraphMap2</b> | 95.89        | 98.55        | 89.04        | 255        | 6         | 80.89        |
| <b>ngmlr</b>     | 93.94        | 98.48        | 90.94        | 257        | 4         | <b>12.13</b> |
| <b>Minimap2</b>  | 96.27        | 98.47        | 85.10        | 263        | 43        | 26.67        |
| <b>STARlong</b>  | 93.17        | 97.92        | 81.23        | 201        | 6         | 34.88        |

Supplementary Table S29: Benchmark of aligners on real WGS contiguous TGS reads from *Homo sapiens*. Metrics include mapping rate (Map rate, %), minimum alignment identity (Min identity, %), minimum alignment length (Min length), alignment speed (Speed, aligned reads per second), and peak memory usage (RAM, Gb). Best values for each metric, except the minimum identity and minimum length, are highlighted in bold.

| Aligner   | Map rate      | Min identity | Min length | Speed     | RAM          |
|-----------|---------------|--------------|------------|-----------|--------------|
| VAT       | <b>100.00</b> | 62.89        | 44         | <b>63</b> | 21.45        |
| BLASR     | <b>100.00</b> | 61.23        | 40         | 1         | 30.33        |
| GMAP      | 86.95         | 60.77        | 45         | 4         | <b>14.20</b> |
| GraphMap2 | 20.97         | 62.96        | 41         | 2         | 84.37        |
| ngmlr     | 83.47         | 61.13        | 44         | 13        | 23.78        |
| Minimap2  | <b>100.00</b> | 60.87        | 44         | 30        | 24.16        |
| STARlong  | 84.25         | 62.81        | 44         | 5         | 33.41        |

Supplementary Table S30: Benchmark of aligners on real CHIP-seq contiguous TGS read from *Homo sapiens*. Metrics include mapping rate (Map rate, %), minimum alignment identity (Min identity, %), minimum alignment length (Min length), alignment speed (Speed, aligned reads per second), and peak memory usage (RAM, Gb). Best values for each metric, except the minimum identity and minimum length, are highlighted in bold.

| Aligner   | Map rate      | Min identity | Min length | Speed      | RAM          |
|-----------|---------------|--------------|------------|------------|--------------|
| VAT       | <b>100.00</b> | 66.23        | 42         | <b>420</b> | 18.78        |
| BLASR     | <b>100.00</b> | 60.11        | 40         | 14         | 30.33        |
| GMAP      | 98.98         | 67.89        | 20         | 5          | 12.76        |
| GraphMap2 | 91.03         | 58.41        | 20         | 11         | 53.77        |
| ngmlr     | 94.89         | 64.78        | 40         | 363        | <b>11.89</b> |
| Minimap2  | 99.03         | 56.99        | 43         | 259        | 21.32        |
| STARlong  | 95.51         | 59.23        | 42         | 40         | 33.40        |

Supplementary Table S31: Benchmark of aligners on real ATAC-seq contiguous TGS reads from *Homo sapiens*. Metrics include mapping rate (Map rate, %), minimum alignment identity (Min identity, %), minimum alignment length (Min length), alignment speed (Speed, aligned reads per second), and peak memory usage (RAM, Gb). Best values for each metric, except the minimum identity and minimum length, are highlighted in bold.

| Aligner   | Map rate      | Min identity | Min length | Speed      | RAM          |
|-----------|---------------|--------------|------------|------------|--------------|
| VAT       | <b>100.00</b> | 60.31        | 65         | <b>277</b> | 21.89        |
| BLASR     | <b>100.00</b> | 57.78        | 40         | 12         | 30.06        |
| GMAP      | 12.88         | 61.02        | 51         | 1          | 11.89        |
| GraphMap2 | 10.92         | 60.10        | 50         | 1          | 78.04        |
| ngmlr     | 96.21         | 60.78        | 51         | 96         | <b>10.41</b> |
| Minimap2  | <b>100.00</b> | 56.04        | 66         | 196        | 19.90        |
| STARlong  | 77.58         | 59.07        | 56         | 7          | 38.44        |

Supplementary Table S32: Benchmark of aligners on microbiome contiguous TGS reads. Metrics include mapping rate (Map rate, %), minimum alignment identity (Min identity, %), minimum alignment length (Min length), alignment speed (Speed, aligned reads per second), and peak memory usage (RAM, Gb). Best values for each metric, except the minimum identity and minimum length, are highlighted in bold.

| <b>Aligner</b>   | <b>Map rate</b> | <b>Min identity</b> | <b>Min length</b> | <b>Speed</b> | <b>RAM</b>   |
|------------------|-----------------|---------------------|-------------------|--------------|--------------|
| <b>VAT</b>       | <b>100.00</b>   | 65.03               | 43                | <b>2355</b>  | 19.78        |
| <b>BLASR</b>     | <b>100.00</b>   | 62.09               | 39                | 149          | 19.45        |
| <b>GMAP</b>      | 94.94           | 67.89               | 40                | 13           | 12.03        |
| <b>GraphMap2</b> | 0.00            | 0.00                | 0                 | 0            | <b>11.21</b> |
| <b>ngmlr</b>     | 63.39           | 59.78               | 39                | 127          | 13.85        |
| <b>Minimap2</b>  | 99.62           | 61.94               | 44                | 58           | 25.06        |
| <b>STARlong</b>  | 36.96           | 60.88               | 36                | 7            | 26.67        |

Supplementary Table S33: Benchmark of aligners on contiguous TGS reads from *Caenorhabditis elegans*. Metrics include mapping rate (Map rate, %), minimum alignment identity (Min identity, %), minimum alignment length (Min length), alignment speed (Speed, aligned reads per second), and peak memory usage (RAM, Gb). Best values for each metric, except the minimum identity and minimum length, are highlighted in bold.

| <b>Aligner</b>   | <b>Map rate</b> | <b>Min identity</b> | <b>Min length</b> | <b>Speed</b> | <b>RAM</b>   |
|------------------|-----------------|---------------------|-------------------|--------------|--------------|
| <b>VAT</b>       | <b>100.00</b>   | 62.89               | 318               | <b>893</b>   | 17.23        |
| <b>BLASR</b>     | <b>100.00</b>   | 59.04               | 39                | 69           | 27.89        |
| <b>GMAP</b>      | 99.35           | 59.14               | 71                | 15           | <b>11.89</b> |
| <b>GraphMap2</b> | 14.01           | 59.08               | 69                | 29           | 66.89        |
| <b>ngmlr</b>     | 99.13           | 62.77               | 36                | 256          | 13.31        |
| <b>Minimap2</b>  | 99.80           | 65.89               | 40                | 693          | 23.88        |
| <b>STARlong</b>  | 95.26           | 60.05               | 320               | 227          | 26.37        |

Supplementary Table S34: Benchmark of aligners on contiguous TGS reads from *Drosophila melanogaster*. Metrics include mapping rate (Map rate, %), minimum alignment identity (Min identity, %), minimum alignment length (Min length), alignment speed (Speed, aligned reads per second), and peak memory usage (RAM, Gb). Best values for each metric, except the minimum identity and minimum length, are highlighted in bold.

| Aligner   | Map rate      | Min identity | Min length | Speed      | RAM          |
|-----------|---------------|--------------|------------|------------|--------------|
| VAT       | <b>100.00</b> | 65.77        | 50         | <b>426</b> | 22.24        |
| BLASR     | <b>100.00</b> | 59.45        | 40         | 26         | 26.99        |
| GMAP      | 98.03         | 68.04        | 21         | 7          | 13.77        |
| GraphMap2 | 12.97         | 63.10        | 40         | 19         | 59.14        |
| ngmlr     | 87.84         | 64.00        | 51         | 54         | <b>11.04</b> |
| Minimap2  | 98.89         | 66.88        | 43         | 412        | 22.84        |
| STARlong  | 41.19         | 65.32        | 41         | 18         | 26.19        |

Supplementary Table S35: Benchmark of aligners on contiguous TGS reads from *Mus musculus*. Metrics include mapping rate (Map rate, %), minimum alignment identity (Min identity, %), minimum alignment length (Min length), alignment speed (Speed, aligned reads per second), and peak memory usage (RAM, Gb). Best values for each metric, except the minimum identity and minimum length, are highlighted in bold.

| Aligner   | Map rate      | Min identity | Min length | Speed      | RAM          |
|-----------|---------------|--------------|------------|------------|--------------|
| VAT       | <b>100.00</b> | 59.41        | 62         | <b>490</b> | 21.94        |
| BLASR     | <b>100.00</b> | 58.33        | 40         | 14         | 27.31        |
| GMAP      | 90.77         | 55.76        | 52         | 36         | <b>12.87</b> |
| GraphMap2 | 41.89         | 60.90        | 43         | 8          | 85.43        |
| ngmlr     | 88.98         | 50.40        | 52         | 41         | <b>12.87</b> |
| Minimap2  | 92.25         | 55.23        | 40         | 128        | 24.10        |
| STARlong  | 46.28         | 60.11        | 63         | 4          | 48.51        |

Supplementary Table S36: Benchmark of aligners on contiguous TGS reads from *Oryza sativa*. Metrics include mapping rate (Map rate, %), minimum alignment identity (Min identity, %), minimum alignment length (Min length), alignment speed (Speed, aligned reads per second), and peak memory usage (RAM, Gb). Best values for each metric, except the minimum identity and minimum length, are highlighted in bold.

| Aligner   | Map rate      | Min identity | Min length | Speed      | RAM          |
|-----------|---------------|--------------|------------|------------|--------------|
| VAT       | <b>100.00</b> | 64.04        | 48         | <b>141</b> | 17.94        |
| BLASR     | <b>100.00</b> | 60.20        | 46         | 28         | 24.99        |
| GMAP      | 87.93         | 68.33        | 35         | 8          | <b>11.30</b> |
| GraphMap2 | 60.94         | 61.23        | 44         | 42         | 65.04        |
| ngmlr     | 94.91         | 62.18        | 44         | 58         | 11.34        |
| Minimap2  | 99.98         | 60.78        | 45         | 139        | 20.88        |
| STARlong  | 67.62         | 61.04        | 45         | 43         | 29.11        |

Supplementary Table S37: Benchmark of aligners on contiguous TGS reads from *Arabidopsis thaliana*. Metrics include mapping rate (Map rate, %), minimum alignment identity (Min identity, %), minimum alignment length (Min length), alignment speed (Speed, aligned reads per second), and peak memory usage (RAM, Gb). Best values for each metric, except the minimum identity and minimum length, are highlighted in bold.

| Aligner   | Map rate      | Min identity | Min length | Speed       | RAM         |
|-----------|---------------|--------------|------------|-------------|-------------|
| VAT       | <b>100.00</b> | 64.88        | 42         | <b>7692</b> | 16.23       |
| BLASR     | <b>100.00</b> | 61.23        | 26         | 452         | 23.59       |
| GMAP      | 88.97         | 63.78        | 42         | 185         | <b>9.98</b> |
| GraphMap2 | 89.95         | 60.00        | 31         | 224         | 61.87       |
| ngmlr     | <b>100.00</b> | 63.50        | 22         | 1351        | 12.43       |
| Minimap2  | 94.87         | 62.00        | 40         | 5929        | 19.03       |
| STARlong  | 51.04         | 69.87        | 18         | 132         | 29.50       |

Supplementary Table S38: Summary of the split third-generation sequencing (TGS) datasets and simulation commands used in this study. The columns represent the dataset label (Label), sequence continuity status (SCS), data type, source organism (Organism), number of reads (# Reads), average read (Len.), and accession numbers. *H. sapiens* refers to *Homo sapiens*, Gut MG refers to Gut Metagenome, *C. elegans* (*Caenorhabditis elegans*), *D. melan* (*Drosophila melanogaster*), *M. mus* (*Mus musculus*), *O. sativa* (*Oryza sativa*), and *A. thalia* (*Arabidopsis thaliana*). Specifically, TGS-Sim-DS1 is a simulated whole-genome sequencing dataset with an error rate of 12%; TGS-Sim-DS2 is a simulated RNA-Seq dataset with an introduced error rate of 15%. TGS-Sim-DS3 is a simulated Hi-C dataset with an error rate of 15%.

| Label                      | SCS   | Data type  | Organism          | # Reads | Len. | Accession   | Simulation parameters                                                                                                                                                                                                |
|----------------------------|-------|------------|-------------------|---------|------|-------------|----------------------------------------------------------------------------------------------------------------------------------------------------------------------------------------------------------------------|
| <b>TGS-Sim-DS2 (PBSIM)</b> | Split | Simulation | <i>H. sapiens</i> | 0.41M   | 7800 | N/A         | pbsim --data-type CLR --depth 40 --length-mean 3080 --length-sd 2211 --length-min 50 --length-max 50000 --accuracy-mean 0.95 --accuracy-sd 0.11 --accuracy-min 0.7 --difference-ratio 47:38:15 transcriptome_hg38.fa |
| <b>TGS-DS10</b>            | Split | RNA-Seq    | <i>H. sapiens</i> | 0.43M   | 928  | SRR32923630 | N/A                                                                                                                                                                                                                  |
| <b>TGS-DS11</b>            | Split | RNA-Seq    | <i>C. elegans</i> | 1.1M    | 902  | SRR29522715 | N/A                                                                                                                                                                                                                  |
| <b>TGS-DS12</b>            | Split | RNA-Seq    | <i>D. melan</i>   | 2.4M    | 1113 | SRR32701026 | N/A                                                                                                                                                                                                                  |
| <b>TGS-DS13</b>            | Split | RNA-Seq    | <i>M. mus</i>     | 530.9K  | 1024 | SRR32517545 | N/A                                                                                                                                                                                                                  |
| <b>TGS-DS14</b>            | Split | RNA-Seq    | <i>O. sativa</i>  | 6.5M    | 814  | SRR30002035 | N/A                                                                                                                                                                                                                  |
| <b>TGS-DS15</b>            | Split | RNA-Seq    | <i>A. thalia</i>  | 42.8K   | 513  | ERR14185199 | N/A                                                                                                                                                                                                                  |

Supplementary Table S39: Summary of long-read split aligners, their software versions, and the specific command-line parameters used for benchmarking in this study.

| <b>Aligner</b>   | <b>Version</b> | <b>Command</b>                                                                                                                                                                                                                                                                                                                                                                                                                                                                                                                                                                                                                                                                                        |
|------------------|----------------|-------------------------------------------------------------------------------------------------------------------------------------------------------------------------------------------------------------------------------------------------------------------------------------------------------------------------------------------------------------------------------------------------------------------------------------------------------------------------------------------------------------------------------------------------------------------------------------------------------------------------------------------------------------------------------------------------------|
| <b>BLASR</b>     | 2012           | blasr long_split_reads.fa reference.fa -nproc 16 -sam -bestn 10                                                                                                                                                                                                                                                                                                                                                                                                                                                                                                                                                                                                                                       |
| <b>GMAP</b>      | 6/24/2024      | graphmap2 -r reference.fa -q long_split_reads.fa -f samse -t 16                                                                                                                                                                                                                                                                                                                                                                                                                                                                                                                                                                                                                                       |
| <b>GraphMap2</b> | 0.6.5          | -t 16                                                                                                                                                                                                                                                                                                                                                                                                                                                                                                                                                                                                                                                                                                 |
| <b>Minimap2</b>  | 2.30 (r1287)   | minimap2 reference.fa long_split_reads.fa -ax splice -uf -k14 -t 16                                                                                                                                                                                                                                                                                                                                                                                                                                                                                                                                                                                                                                   |
| <b>ngmlr</b>     | 0.2.7          | ngmlr -r reference.fa -q long_split_reads.fa -x ont -t 16                                                                                                                                                                                                                                                                                                                                                                                                                                                                                                                                                                                                                                             |
| <b>STARlong</b>  | 2.7.11b        | STARlong --genomeDir STAR_db<br>--readFilesIn long_split_reads.fa<br>--runThreadN 16 \<br>--seedSearchStartLmax 14 \<br>--seedPerReadNmax 100000 \<br>--seedPerWindowNmax 100 \<br>--winAnchorMultimapNmax 200 \<br>--outFilterMultimapNmax 100000 \<br>--outFilterMismatchNmax 100000 \<br>--outFilterScoreMin 0 --outFilterScoreMinOverLread 0 \<br>--outFilterMatchNmin 0 --outFilterMatchNminOverLread 0 \<br>--alignIntronMin 20 --alignIntronMax 1000000 \<br>--alignSJoverhangMin 8 --alignSJDBoverhangMin 1 \<br>--alignMatesGapMax 1000000 \<br>--clip3pAfterAdapterNbases 1 --clip5pNbases 0 \<br>--chimOutType WithinBAM SoftClip \<br>--outSAMtype SAM \<br>--limitBAMsortRAM 12000000000 |
| <b>VAT</b>       | 0.0.1          | VAT nucl long RNAseq -p 16 -d reference.fa -q long_split_reads.fa                                                                                                                                                                                                                                                                                                                                                                                                                                                                                                                                                                                                                                     |

Supplementary Table S40: Benchmark of long-read aligners on simulated split TGS reads from *Homo sapiens*. Metrics include mapping rate (Map rate, %), proportions of contiguous alignments (Contiguous, %), proportions of split alignments (Split, %), accuracy (%), proportion of known split events (Known, %), alignment speed (Speed, aligned reads per second), and peak memory usage (RAM, Gb). Values in bold indicate the best performance for each metric.

| Aligner          | Map rate     | Contiguous   | Split        | Accuracy     | Known        | Speed      | RAM          |
|------------------|--------------|--------------|--------------|--------------|--------------|------------|--------------|
| <b>VAT</b>       | <b>98.02</b> | 22.91        | <b>75.11</b> | <b>86.80</b> | <b>83.36</b> | <b>964</b> | 24.41        |
| <b>BLASR</b>     | 94.49        | 27.89        | 66.60        | 78.82        | 71.45        | 79         | 22.59        |
| <b>GMAP</b>      | 74.77        | 17.76        | 57.01        | 81.29        | 76.83        | 23         | <b>10.04</b> |
| <b>GraphMap2</b> | 94.50        | 20.30        | 74.20        | 76.56        | 71.74        | 19         | 101.11       |
| <b>ngmlr</b>     | 54.80        | 22.48        | 32.32        | 53.00        | 20.80        | 627        | 11.88        |
| <b>Minimap2</b>  | 94.61        | 21.70        | 72.91        | 85.95        | 82.33        | 659        | 25.78        |
| <b>STARlong</b>  | 85.06        | <b>35.15</b> | 49.91        | 84.70        | 74.95        | 155        | 22.79        |

Supplementary Table S41: Benchmark of long-read aligners on real TGS RNA-seq reads from *Homo sapiens*. Metrics include mapping rate (Map rate, %), proportions of contiguous alignments (Contiguous, %), proportions of split alignments (Split, %), proportion of known split events (Known, %), alignment speed (Speed, aligned reads per second), and peak memory usage (RAM, Gb). Values in bold indicate the best performance for each metric.

| Aligner   | Map rate     | Contiguous   | Split        | Known        | Speed      | RAM         |
|-----------|--------------|--------------|--------------|--------------|------------|-------------|
| VAT       | <b>96.81</b> | 25.97        | <b>70.84</b> | <b>84.46</b> | <b>899</b> | 23.33       |
| BLASR     | 95.68        | 34.96        | 60.72        | 73.42        | 86         | 100.89      |
| GMAP      | 90.69        | 40.88        | 49.81        | 73.22        | 84         | <b>9.11</b> |
| GraphMap2 | 59.98        | 30.11        | 29.87        | 66.82        | 3          | 64.87       |
| ngmlr     | 54.97        | <b>49.89</b> | 5.08         | 40.16        | 14         | 12.89       |
| Minimap2  | 95.48        | 35.03        | 60.45        | 77.70        | 789        | 24.91       |
| STARlong  | 87.25        | 40.89        | 46.36        | 81.77        | 53         | 38.14       |

Supplementary Table S42: Benchmark of long-read aligners on TGS RNA-seq reads from *Caenorhabditis elegans*. Metrics include mapping rate (Map rate, %), proportions of contiguous alignments (Contiguous, %), proportions of split alignments (Split, %), proportion of known split events (Known, %), alignment speed (Speed, aligned reads per second), and peak memory usage (RAM, Gb). Values in bold indicate the best performance for each metric.

| Aligner   | Map rate      | Contiguous   | Split        | Known        | Speed        | RAM         |
|-----------|---------------|--------------|--------------|--------------|--------------|-------------|
| VAT       | <b>100.00</b> | 11.03        | <b>88.97</b> | 88.80        | <b>16129</b> | 20.89       |
| BLASR     | <b>100.00</b> | <b>65.00</b> | 35.00        | 53.68        | 810          | 23.14       |
| GMAP      | 87.99         | 8.49         | 79.50        | <b>77.78</b> | 356          | <b>9.89</b> |
| GraphMap2 | 86.20         | 13.62        | 72.58        | <b>91.73</b> | 397          | 100.91      |
| ngmlr     | 58.09         | 48.03        | 10.06        | 20.69        | 1208         | 12.33       |
| Minimap2  | 80.98         | 9.09         | 71.89        | 85.65        | 10176        | 25.78       |
| STARlong  | 67.28         | 13.72        | 53.56        | 83.08        | 18           | 24.53       |

Supplementary Table S43: Benchmark of long-read aligners on TGS RNA-seq reads from *Drosophila melanogaster*. Metrics include mapping rate (Map rate, %), proportions of contiguous alignments (Contiguous, %), proportions of split alignments (Split, %), proportion of known split events (Known, %), alignment speed (Speed, aligned reads per second), and peak memory usage (RAM, Gb). Values in bold indicate the best performance for each metric.

| Aligner   | Map rate     | Contiguous   | Split        | Known        | Speed        | RAM          |
|-----------|--------------|--------------|--------------|--------------|--------------|--------------|
| VAT       | <b>99.91</b> | 41.03        | <b>58.88</b> | <b>88.14</b> | <b>47610</b> | 22.23        |
| BLASR     | 98.96        | 61.92        | 37.04        | 67.43        | 3690         | 28.97        |
| GMAP      | 84.19        | 36.94        | 47.25        | 85.44        | 76           | 11.43        |
| GraphMap2 | 90.89        | 41.87        | 49.02        | 83.51        | 2390         | 65.13        |
| ngmlr     | 85.02        | <b>63.31</b> | 21.71        | 37.45        | 443          | <b>10.96</b> |
| Minimap2  | 91.71        | 38.60        | 53.11        | 85.14        | 29568        | 25.30        |
| STARlong  | 73.21        | 29.34        | 43.86        | 84.10        | 158          | 27.41        |

Supplementary Table S44: Benchmark of long-read aligners on TGS RNA-seq reads from *Mus musculus*. Metrics include mapping rate (Map rate, %), proportions of contiguous alignments (Contiguous, %), proportions of split alignments (Split, %), proportion of known split events (Known, %), alignment speed (Speed, aligned reads per second), and peak memory usage (RAM, Gb). Values in bold indicate the best performance for each metric.

| Aligner   | Map rate      | Contiguous   | Split        | Known        | Speed        | RAM          |
|-----------|---------------|--------------|--------------|--------------|--------------|--------------|
| VAT       | <b>100.00</b> | 20.03        | <b>79.97</b> | <b>83.81</b> | <b>17241</b> | 23.33        |
| BLASR     | <b>100.00</b> | 28.98        | 71.02        | 78.12        | 490          | 26.78        |
| GMAP      | 94.96         | 23.96        | 71.00        | 67.26        | 238          | 11.89        |
| GraphMap2 | 94.98         | 25.01        | 69.97        | 83.59        | 303          | 65.13        |
| ngmlr     | 97.59         | <b>62.69</b> | 34.90        | 48.31        | 4866         | <b>10.78</b> |
| Minimap2  | 99.81         | 23.03        | 76.78        | 83.07        | 6836         | 24.98        |
| STARlong  | 80.04         | 35.39        | 44.64        | 77.26        | 292          | 37.06        |

Supplementary Table S45: Benchmark of long-read aligners on TGS RNA-seq reads from *Oryza sativa*. Metrics include mapping rate (Map rate, %), proportions of contiguous alignments (Contiguous, %), proportions of split alignments (Split, %), proportion of known split events (Known, %), alignment speed (Speed, aligned reads per second), and peak memory usage (RAM, Gb). Values in bold indicate the best performance for each metric.

| Aligner   | Map rate      | Contiguous   | Split        | Known        | Speed        | RAM          |
|-----------|---------------|--------------|--------------|--------------|--------------|--------------|
| VAT       | <b>100.00</b> | 54.89        | 45.11        | <b>80.04</b> | <b>52632</b> | 23.03        |
| BLASR     | <b>100.00</b> | 47.98        | <b>52.02</b> | 61.58        | 2618         | 28.33        |
| GMAP      | 93.01         | 50.04        | 42.97        | 78.85        | 911          | <b>10.91</b> |
| GraphMap2 | 98.58         | <b>74.87</b> | 23.71        | 54.44        | 1641         | 62.77        |
| ngmlr     | 26.01         | 23.03        | 2.98         | 43.63        | 8387         | 11.04        |
| Minimap2  | 99.47         | 71.97        | 27.50        | 67.15        | 17454        | 22.95        |
| STARlong  | 93.00         | 43.46        | 49.54        | 77.23        | 141          | 27.11        |

Supplementary Table S46: Benchmark of long-read aligners on TGS RNA-seq reads from *Arabidopsis thaliana*. Metrics include mapping rate (Map rate, %), proportions of contiguous alignments (Contiguous, %), proportions of split alignments (Split, %), proportion of known split events (Known, %), alignment speed (Speed, aligned reads per second), and peak memory usage (RAM, Gb). Values in bold indicate the best performance for each metric.

| Aligner          | Map rate      | Contiguous   | Split        | Known        | Speed         | RAM         |
|------------------|---------------|--------------|--------------|--------------|---------------|-------------|
| <b>VAT</b>       | <b>100.00</b> | 48.03        | <b>51.97</b> | <b>86.41</b> | <b>125000</b> | 21.06       |
| <b>BLASR</b>     | 92.80         | 46.89        | 45.91        | 47.67        | 11364         | 28.20       |
| <b>GMAP</b>      | 89.98         | 49.03        | 40.95        | 70.11        | 4093          | 12.78       |
| <b>GraphMap2</b> | 93.88         | 42.97        | 50.91        | 72.03        | 6345          | 61.50       |
| <b>ngmlr</b>     | 59.39         | 46.01        | 13.38        | 55.38        | 13395         | <b>9.95</b> |
| <b>Minimap2</b>  | 90.49         | 39.88        | 50.61        | 77.29        | 69615         | 23.20       |
| <b>STARlong</b>  | 99.52         | <b>89.32</b> | 10.20        | 77.98        | 29            | 36.45       |

Supplementary Table S47: Summary of protein homology search tools, their software versions, and the specific command-line parameters used for benchmarking in this study.

| <b>Aligner</b>         | <b>Version</b> | <b>Command</b>                                                                                                                                |
|------------------------|----------------|-----------------------------------------------------------------------------------------------------------------------------------------------|
| <b>BLAST</b>           | 2.16.0         | blastp -db protein_homology_reference.fa.blast.db -<br>query protein_homology_query.fa<br>-outfmt 6 -num_threads 8 -max_target_seqs 5 -evalue |
| <b>DIAMOND</b>         | 2.1.12         | diamond blastp -d<br>protein_homology_reference.fa.dmd.db -q<br>protein_homology_query.fa<br>-p 8 -fast -k 5 -e                               |
| <b>DIAMOND</b>         | 2.1.12         | diamond blastp -d<br>protein_homology_reference.fa.dmd.db -q<br>protein_homology_query.fa<br>-p 8 -ultra-sensitive -k 5 -e                    |
| <b>MMseqs2</b>         | 17-b804f       | mmseqs easy-search protein_homology_query.fa<br>protein_homology_reference.fa<br>tmp --threads 8 -e --max-seqs 5 -s 1                         |
| <b>MMseqs2</b>         | 17-b804f       | mmseqs easy-search protein_homology_query.fa<br>protein_homology_reference.fa<br>tmp --threads 8 -e --max-seqs 5 -s 7.5                       |
| <b>RAPSearch2</b>      | 2.22           | rapsearch -d protein_homology_reference.fa.rapsearch<br>-q protein_homology_query.fa<br>-z 4 -m 8 -b 5                                        |
| <b>VAT (fast)</b>      | 0.0.1          | VAT protein_homology fast -p 8 -e -k 5 -d<br>protein_homology_reference.fa -q<br>protein_homology_query.fa                                    |
| <b>VAT (sensitive)</b> | 0.0.1          | VAT protein_homology sensitive -p 8 -e -k 5 -d<br>protein_homology_reference.fa -q<br>protein_homology_query.fa                               |

Supplementary Table S48: Summary of DNA homology search tools, their software versions, and the specific command-line parameters used for benchmarking in this study.

| <b>Aligner</b> | <b>Version</b> | <b>Command</b>                                                                                                                         |
|----------------|----------------|----------------------------------------------------------------------------------------------------------------------------------------|
| <b>BLAST</b>   | 2.16.0         | blastn -db DNA_homology_reference.fa.db -query DNA_homology_query.fa<br>-outfmt 6 -num_threads 16 -max_target_seqs 2                   |
| <b>pblat</b>   | 2.1.12         | pblat DNA_homology_reference.fa DNA_homology_query.fa -threads=16 -<br>minIdentity=90 -minScore=30 -tileSize=8 -stepSize=5 -out=blast8 |
| <b>VAT</b>     | 0.0.1          | VAT nucl homology null -p 16 -e -k 2 -q DNA_homology_query.fa -d<br>DNA_homology_reference.fa                                          |

Supplementary Table S49: Benchmark of protein homology search tools across varying E-value thresholds. Metrics include precision, sensitivity, F1 score (F1), alignment speed (Speed, aligned queries per second), and peak memory usage (RAM, Gb). Values in bold indicate the best performance for each metric.

| Aligner                 | E-value  | Precision | Sensitivity  | F1           | Speed | RAM          |
|-------------------------|----------|-----------|--------------|--------------|-------|--------------|
| BLASTP                  | 1        | 0.756     | <b>0.730</b> | 0.743        | 47    | 0.161        |
| BLASTP                  | 0.1      | 0.922     | 0.679        | <b>0.782</b> | 48    | 0.164        |
| BLASTP                  | 0.01     | 0.960     | 0.640        | 0.768        | 50    | 0.161        |
| BLASTP                  | 0.001    | 0.970     | 0.603        | 0.744        | 51    | 0.162        |
| BLASTP                  | 0.0001   | 0.973     | 0.566        | 0.716        | 54    | 0.161        |
| BLASTP                  | 1.00E-05 | 0.977     | 0.532        | 0.689        | 54    | 0.158        |
| BLASTP                  | 1.00E-06 | 0.979     | 0.500        | 0.662        | 54    | 0.153        |
| BLASTP                  | 1.00E-07 | 0.980     | 0.472        | 0.637        | 54    | <b>0.144</b> |
| VAT sensitive           | 1        | 0.873     | 0.679        | 0.764        | 341   | 0.558        |
| VAT sensitive           | 0.1      | 0.932     | 0.657        | 0.773        | 348   | 0.549        |
| VAT sensitive           | 0.01     | 0.958     | 0.636        | 0.765        | 347   | 0.549        |
| VAT sensitive           | 0.001    | 0.967     | 0.602        | 0.742        | 347   | 0.553        |
| VAT sensitive           | 0.0001   | 0.971     | 0.578        | 0.729        | 346   | 0.539        |
| VAT sensitive           | 1.00E-05 | 0.977     | 0.543        | 0.699        | 345   | 0.538        |
| VAT sensitive           | 1.00E-06 | 0.978     | 0.512        | 0.671        | 344   | 0.537        |
| VAT sensitive           | 1.00E-07 | 0.981     | 0.471        | 0.637        | 344   | 0.539        |
| MMseqs2 s7.5            | 1        | 0.880     | 0.661        | 0.755        | 223   | 1.015        |
| MMseqs2 s7.5            | 0.1      | 0.941     | 0.640        | 0.762        | 239   | 1.013        |
| MMseqs2 s7.5            | 0.01     | 0.960     | 0.622        | 0.755        | 241   | 1.011        |
| MMseqs2 s7.5            | 0.001    | 0.972     | 0.591        | 0.735        | 243   | 1.011        |
| MMseqs2 s7.5            | 0.0001   | 0.973     | 0.550        | 0.703        | 246   | 1.012        |
| MMseqs2 s7.5            | 1.00E-05 | 0.974     | 0.522        | 0.680        | 248   | 1.01         |
| MMseqs2 s7.5            | 1.00E-06 | 0.977     | 0.490        | 0.653        | 248   | 1.002        |
| MMseqs2 s7.5            | 1.00E-07 | 0.980     | 0.461        | 0.627        | 249   | 1.005        |
| DIAMOND ultra-sensitive | 1        | 0.888     | 0.663        | 0.759        | 301   | 0.321        |
| DIAMOND ultra-sensitive | 0.1      | 0.940     | 0.649        | 0.768        | 319   | 0.312        |
| DIAMOND ultra-sensitive | 0.01     | 0.961     | 0.626        | 0.758        | 324   | 0.331        |
| DIAMOND ultra-sensitive | 0.001    | 0.971     | 0.592        | 0.736        | 343   | 0.311        |
| DIAMOND ultra-sensitive | 0.0001   | 0.975     | 0.559        | 0.711        | 343   | 0.308        |
| DIAMOND ultra-sensitive | 1.00E-05 | 0.977     | 0.527        | 0.685        | 344   | 0.306        |
| DIAMOND ultra-sensitive | 1.00E-06 | 0.979     | 0.497        | 0.659        | 344   | 0.31         |
| DIAMOND ultra-sensitive | 1.00E-07 | 0.981     | 0.469        | 0.635        | 347   | 0.305        |
| VAT fast                | 1        | 0.920     | 0.370        | 0.528        | 3301  | 0.625        |
| VAT fast                | 0.1      | 0.944     | 0.366        | 0.527        | 3322  | 0.626        |
| VAT fast                | 0.01     | 0.955     | 0.361        | 0.524        | 3330  | 0.611        |
| VAT fast                | 0.001    | 0.963     | 0.354        | 0.518        | 3335  | 0.611        |
| VAT fast                | 0.0001   | 0.968     | 0.345        | 0.509        | 3341  | 0.604        |
| VAT fast                | 1.00E-05 | 0.971     | 0.336        | 0.499        | 3341  | 0.613        |

Continue to next page

|              |          |              |       |       |             |       |
|--------------|----------|--------------|-------|-------|-------------|-------|
| VAT fast     | 1.00E-06 | 0.972        | 0.327 | 0.489 | 3352        | 0.615 |
| VAT fast     | 1.00E-07 | 0.975        | 0.318 | 0.480 | 3352        | 0.609 |
| MMseqs2 s1   | 1        | 0.980        | 0.219 | 0.358 | 2488        | 0.91  |
| MMseqs2 s1   | 0.1      | 0.981        | 0.218 | 0.357 | 2491        | 0.903 |
| MMseqs2 s1   | 0.01     | 0.981        | 0.218 | 0.357 | 2491        | 0.905 |
| MMseqs2 s1   | 0.001    | 0.982        | 0.217 | 0.355 | 2493        | 0.901 |
| MMseqs2 s1   | 0.0001   | 0.983        | 0.215 | 0.353 | 2503        | 0.898 |
| MMseqs2 s1   | 1.00E-05 | 0.983        | 0.213 | 0.350 | 2506        | 0.902 |
| MMseqs2 s1   | 1.00E-06 | 0.984        | 0.211 | 0.347 | 2510        | 0.899 |
| MMseqs2 s1   | 1.00E-07 | 0.984        | 0.208 | 0.343 | 2512        | 0.905 |
| DIAMOND fast | 1        | 0.982        | 0.187 | 0.314 | 3301        | 0.161 |
| DIAMOND fast | 0.1      | 0.983        | 0.186 | 0.313 | 3305        | 0.162 |
| DIAMOND fast | 0.01     | 0.983        | 0.186 | 0.313 | 3317        | 0.166 |
| DIAMOND fast | 0.001    | 0.984        | 0.185 | 0.311 | 3325        | 0.171 |
| DIAMOND fast | 0.0001   | 0.984        | 0.184 | 0.310 | 3335        | 0.161 |
| DIAMOND fast | 1.00E-05 | 0.984        | 0.183 | 0.309 | 3346        | 0.158 |
| DIAMOND fast | 1.00E-06 | <b>0.985</b> | 0.181 | 0.306 | 3356        | 0.159 |
| DIAMOND fast | 1.00E-07 | <b>0.985</b> | 0.180 | 0.304 | <b>3361</b> | 0.157 |
| RAPSearch2   | 1        | 0.813        | 0.482 | 0.605 | 1231        | 0.836 |
| RAPSearch2   | 0.1      | 0.928        | 0.472 | 0.626 | 1246        | 0.833 |
| RAPSearch2   | 0.01     | 0.931        | 0.471 | 0.626 | 1249        | 0.814 |
| RAPSearch2   | 0.001    | 0.931        | 0.471 | 0.626 | 1250        | 0.811 |
| RAPSearch2   | 0.0001   | 0.931        | 0.471 | 0.626 | 1256        | 0.809 |
| RAPSearch2   | 1.00E-05 | 0.931        | 0.471 | 0.626 | 1271        | 0.822 |
| RAPSearch2   | 1.00E-06 | 0.931        | 0.471 | 0.626 | 1271        | 0.811 |
| RAPSearch2   | 1.00E-07 | 0.931        | 0.471 | 0.626 | 1278        | 0.801 |

Supplementary Table S50: Benchmark of DNA homology search tools across varying E-value thresholds. Metrics include precision, sensitivity, F1 score (F1), alignment speed (Speed, aligned queries per second), and peak memory usage (Memory, Gb). Values in bold indicate the best performance for each metric.

| Aligner       | E-value  | Precision    | Sensitivity  | F1           | Speed     | RAM          |
|---------------|----------|--------------|--------------|--------------|-----------|--------------|
| <b>BLASTN</b> | 1        | 0.540        | 0.310        | 0.394        | 13        | 0.471        |
| <b>BLASTN</b> | 0.1      | 0.545        | 0.303        | 0.389        | 13        | 0.431        |
| <b>BLASTN</b> | 0.01     | 0.550        | 0.300        | 0.388        | 14        | 0.445        |
| <b>BLASTN</b> | 0.001    | 0.554        | 0.298        | 0.388        | 15        | 0.433        |
| <b>BLASTN</b> | 0.0001   | 0.558        | 0.296        | 0.387        | 14        | 0.436        |
| <b>BLASTN</b> | 1.00E-05 | 0.562        | 0.294        | 0.386        | 15        | <b>0.422</b> |
| <b>BLASTN</b> | 1.00E-06 | <b>0.567</b> | 0.289        | 0.383        | 15        | 0.423        |
| <b>VAT</b>    | 1        | 0.530        | <b>0.350</b> | <b>0.422</b> | 27        | 1.461        |
| <b>VAT</b>    | 0.1      | 0.540        | 0.320        | 0.402        | 28        | 1.423        |
| <b>VAT</b>    | 0.01     | 0.548        | 0.310        | 0.396        | 28        | 1.433        |
| <b>VAT</b>    | 0.001    | 0.553        | 0.304        | 0.392        | 29        | 1.413        |
| <b>VAT</b>    | 0.0001   | 0.556        | 0.300        | 0.390        | 29        | 1.411        |
| <b>VAT</b>    | 1.00E-05 | 0.560        | 0.297        | 0.388        | <b>30</b> | 1.423        |
| <b>VAT</b>    | 1.00E-06 | 0.564        | 0.294        | 0.387        | 29        | 1.426        |
| <b>pblat</b>  | 1        | 0.539        | 0.304        | 0.389        | 10        | 0.994        |
| <b>pblat</b>  | 0.1      | 0.540        | 0.303        | 0.388        | 10        | 0.991        |
| <b>pblat</b>  | 0.01     | 0.542        | 0.302        | 0.388        | 10        | 0.992        |
| <b>pblat</b>  | 0.001    | 0.544        | 0.301        | 0.388        | 10        | 0.976        |
| <b>pblat</b>  | 0.0001   | 0.548        | 0.300        | 0.388        | 10        | 0.983        |
| <b>pblat</b>  | 1.00E-05 | 0.550        | 0.298        | 0.387        | 10        | 0.977        |
| <b>pblat</b>  | 1.00E-06 | 0.551        | 0.297        | 0.386        | 10        | 0.992        |

Supplementary Table S51: Comparison of VAT-fast, DIAMOND-fast, and MMseqs2-s1 in aligning two soil metagenomic datasets. Metrics include alignment rate (%), aligned matches, queries aligned, alignment speed (Speed, aligned queries per second), and peak memory usage (RAM, Gb). Values in bold indicate the best performance for each metric.

| Datasets   | Aligner | Alignment rate | Aligned matches | Aligned queries | Speed     | RAM          |
|------------|---------|----------------|-----------------|-----------------|-----------|--------------|
| ERR1872095 | VAT     | <b>99.28</b>   | <b>1898994</b>  | <b>65940</b>    | 13        | 28.77        |
|            | DIAMOND | 96.99          | 1641135         | 64426           | <b>14</b> | <b>10.71</b> |
|            | MMseqs2 | 98.51          | 1652341         | 65429           | 9         | 324.65       |
| ERR1873275 | VAT     | <b>99.36</b>   | <b>2528103</b>  | <b>90930</b>    | 21        | 27.81        |
|            | DIAMOND | 98.05          | 2344125         | 89741           | <b>23</b> | <b>10.79</b> |
|            | MMseqs2 | 98.85          | 2319446         | 90463           | 13        | 351.73       |

Supplementary Table S52: Summary of reference genome assemblies used for whole-genome alignment, including version, total genome size, and number of reference sequences.

| <b>Organism</b>             | <b>Version</b>                          | <b>Size</b> | <b># References</b> |
|-----------------------------|-----------------------------------------|-------------|---------------------|
| <i>Homo sapiens</i>         | GRCh38.p7 (GCA_000001405.22)            | 3.088 Gb    | 525                 |
| <i>Pan troglodytes</i>      | Pan_troglodytes-2.1.4 (GCA_000001515.4) | 3.31 Gb     | 24128               |
| <i>Arabidopsis thaliana</i> | TAIR10 (GCF_000001735.3)                | 120 Mb      | 7                   |
| <i>Arabidopsis lyrata</i>   | v.1.0 (GCF_000004255.1)                 | 207 Mb      | 695                 |

Supplementary Table S53: Summary of whole genome alignment tools, their software versions, and the specific command-line parameters used for benchmarking in this study.

| <b>Aligner</b> | <b>Version</b> | <b>Command</b>                                               |
|----------------|----------------|--------------------------------------------------------------|
| <b>MUMmer4</b> | 4.0.1          | nucmer -c 100 -t 32<br>genome_A.fa genome_B.fa               |
| <b>VAT</b>     | 0.0.1          | VAT nucl wga null -p 32 -d<br>genome_A.fa - q<br>genome_B.fa |

Supplementary Table S54: Comparison of genome alignment coverage between VAT and MUMmer4 across varying sequence similarity levels (%) between *Homo sapiens* and *Pan troglodyte*. Metrics include MUMmer4 coverage (%) and VAT coverage (%).

| <b>Similarity</b> | <b>MUMmer4</b> | <b>VAT</b> |
|-------------------|----------------|------------|
| <b>88.00</b>      | 86.32          | 88.47      |
| <b>90.00</b>      | 86.20          | 87.76      |
| <b>92.00</b>      | 86.05          | 86.73      |
| <b>94.00</b>      | 85.75          | 86.09      |
| <b>96.00</b>      | 84.58          | 85.45      |
| <b>98.00</b>      | 55.10          | 55.70      |

Supplementary Table S55: Comparison of genome alignment coverage between VAT and MUMmer4 across varying sequence similarity levels (%) between *Arabidopsis thaliana* and *Arabidopsis lyrata*. Metrics include MUMmer4 coverage (%) and VAT coverage (%).

| <b>Similarity</b> | <b>MUMmer4</b> | <b>VAT</b> |
|-------------------|----------------|------------|
| <b>70.00</b>      | 52.71          | 54.23      |
| <b>75.00</b>      | 51.64          | 53.12      |
| <b>80.00</b>      | 51.59          | 51.87      |
| <b>85.00</b>      | 35.25          | 34.66      |
| <b>90.00</b>      | 15.66          | 15.86      |
| <b>95.00</b>      | 0.46           | 0.62       |

Supplementary Table S56: Whole-genome alignment performance of VAT and MUMmer4 on *Homo sapiens* (*H. sapiens*) versus *Pan troglodytes* (*P. troglodytes*) and *Arabidopsis thaliana* (*A. thaliana*) versus *Arabidopsis lyrata* (*A. lyrata*). Metrics include total runtime (Time, minutes) and peak memory usage (RAM, Gb). Values in bold indicate the best performance for each metric.

| Aligner | <i>H. sapiens</i> versus <i>P. troglodytes</i> |              | <i>A. thaliana</i> versus <i>A. lyrata</i> |             |
|---------|------------------------------------------------|--------------|--------------------------------------------|-------------|
|         | Time                                           | RAM          | Time                                       | RAM         |
| VAT     | <b>43</b>                                      | 73.76        | <b>2</b>                                   | 8.04        |
| MUMmer4 | 142                                            | <b>57.66</b> | 5                                          | <b>2.98</b> |

## References

- 1 Holtgrewe, M. Mason—a read simulator for second generation sequencing data. *Technical Report FU Berlin* (2010).
- 2 Brooks, T. G. *et al.* BEERS2: RNA-Seq simulation through high fidelity in silico modeling. *bioRxiv* (2023). <https://doi.org/10.1101/2023.04.21.537847>
- 3 Martin, F. J. *et al.* Ensembl 2023. *Nucleic Acids Res* **51**, D933-D941 (2023). <https://doi.org/10.1093/nar/gkac958>
- 4 Wu, W., Zhao, F. & Zhang, J. circAtlas 3.0: a gateway to 3 million curated vertebrate circular RNAs based on a standardized nomenclature scheme. *Nucleic Acids Res* **52**, D52-D60 (2024). <https://doi.org/10.1093/nar/gkad770>
- 5 Zhong, C. & Zhang, S. Accurate and Efficient Mapping of the Cross-Linked microRNA-mRNA Duplex Reads. *iScience* **18**, 11-19 (2019). <https://doi.org/10.1016/j.isci.2019.05.038>
- 6 McGeary, S. E. *et al.* The biochemical basis of microRNA targeting efficacy. *Science* **366** (2019). <https://doi.org/10.1126/science.aav1741>
- 7 Agarwal, V., Bell, G. W., Nam, J. W. & Bartel, D. P. Predicting effective microRNA target sites in mammalian mRNAs. *Elife* **4** (2015). <https://doi.org/10.7554/eLife.05005>
- 8 Helwak, A., Kudla, G., Dudnakova, T. & Tollervey, D. Mapping the human miRNA interactome by CLASH reveals frequent noncanonical binding. *Cell* **153**, 654-665 (2013). <https://doi.org/10.1016/j.cell.2013.03.043>
- 9 Rao, S. S. *et al.* A 3D map of the human genome at kilobase resolution reveals principles of chromatin looping. *Cell* **159**, 1665-1680 (2014). <https://doi.org/10.1016/j.cell.2014.11.021>
- 10 Wick, R. R. Badread: simulation of error-prone long reads. *Journal of Open Source Software* **4**, 1316 (2019).
- 11 Ono, Y., Asai, K. & Hamada, M. PBSIM: PacBio reads simulator--toward accurate genome assembly. *Bioinformatics* **29**, 119-121 (2013). <https://doi.org/10.1093/bioinformatics/bts649>
- 12 Finn, R. D. *et al.* The Pfam protein families database: towards a more sustainable future. *Nucleic Acids Res* **44**, D279-285 (2016). <https://doi.org/10.1093/nar/gkv1344>
- 13 Bateman, A. *et al.* The Pfam protein families database. *Nucleic Acids Res* **30**, 276-280 (2002). <https://doi.org/10.1093/nar/30.1.276>
- 14 Duan, G. *et al.* HGD: an integrated homologous gene database across multiple species. *Nucleic Acids Res* **51**, D994-D1002 (2023). <https://doi.org/10.1093/nar/gkac970>
